# Supplementary material for: Trihalide ionic liquids as non-volatile oxidizing solvents for metals
Source: Royal Society of Chemistry journal article supplement (doi:10.1039/c8gc01061g), 2018-01-01

# Trihalide ionic liquids as non-volatile oxidizing solvents for metals

Arne Van den Bossche, Elise De Witte, Wim Dehaen and Koen Binnemans\*

Electronic supplementary information

## Chlorine reaction setup and procedure

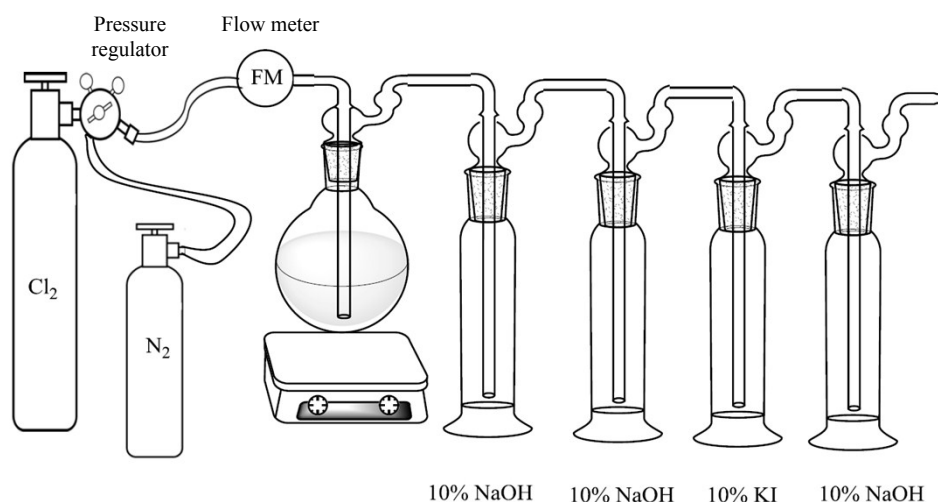

Figure S 1: Schematic overview of the chlorine reaction setup.

A sealed and controllable setup for the addition of chlorine was used, a detector for chlorine gas (with a threshold of 0.5 ppm) was present inside the fume hood monitoring the chlorine level. The chlorine bottle was connected to a flow meter to control the amount of chlorine flowing through the flask. A piece of glassware was designed to bubble the chlorine flow through the IL before being washed by two washing bottles containing a 10 wt% NaOH solution. Another washing bottle containing a KI solution was attached so any remaining chlorine could be detected by a color change of the solution (when chlorine oxidizes iodide, forming the brown colored triiodide anion). This was followed by an additional washing bottle with a 10 wt% NaOH solution.

The IL was dried on a Schlenk line in a round bottom flask while stirring with a stirring bar. Afterwards, the flask was attached to the chlorine setup and nitrogen (2 bar, 20 g/h) was used to purge the system for 30 minutes.<sup>28</sup> The flask was covered with aluminum foil in order to block incident light that can cleave the halide bonds, forming reactive radicals. Then, the nitrogen flow was replaced by chlorine gas (2 bar, 2.1 g/h), which was absorbed by the IL, since no bubbles escaped the IL. After the required amount of chlorine was added, nitrogen was used again to drive all the remaining chlorine gas in the tubing into the IL. This was done for 30 minutes (2 bar, 2.1 g/h).

## Pictures

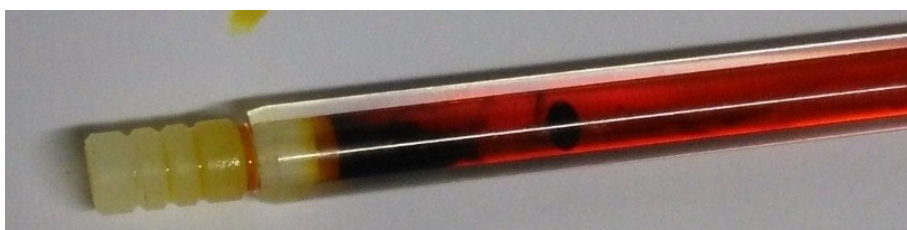

Figure S 2: Reacted viscometer sample containing  $[P_{44410}][Br_3]$  and a gold coated stainless steel ball showing signs of corrosion.

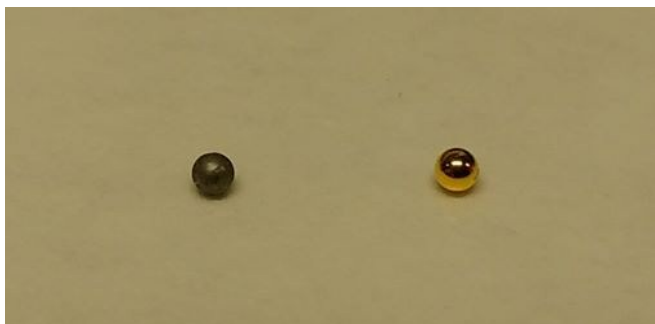

Figure S 3: Corrosion of the gold coated stainless steel ball which was left overnight (left) and an unused ball (right) for viscosity measurements.

## Characterization

### Monohalide ionic liquids

#### [P<sub>44410</sub>]Cl:

<sup>1</sup>H NMR: (300 MHz, CDCl<sub>3</sub>, δ/ppm): 2.47 (m, 8H, 4 CH<sub>2</sub>), 1.54 (m, 16H, 8 CH<sub>2</sub>), 1.26 (m, 12H, 6 CH<sub>2</sub>), 0.98 (m, 9H, 3 CH<sub>3</sub>), 0.88 (m, 3H, 1 CH<sub>3</sub>). <sup>13</sup>C NMR: (75 MHz, CDCl<sub>3</sub>, δ/ppm): 31.84-18.75 (18 CH<sub>2</sub>), 14.05 (1 CH<sub>3</sub>), 13.51 (3 CH<sub>3</sub>). <sup>31</sup>P NMR: (162 MHz, CDCl<sub>3</sub>, δ/ppm): 33.11. Yield: 85%, 16.18 g. Water content: 1423 ppm. Viscosity: 8167 mPa·s (25 °C). Density: 0.917 g/cm<sup>3</sup> (25 °C).

#### [P<sub>44410</sub>]Br:

<sup>1</sup>H NMR: (300 MHz, CDCl<sub>3</sub>, δ/ppm): 2.47 (m, 8H, 4 CH<sub>2</sub>), 1.55 (m, 16H, 8 CH<sub>2</sub>), 1.26 (m, 12H, 6 CH<sub>2</sub>), 0.98 (m, 9H, 3 CH<sub>3</sub>), 0.88 (m, 3H, 1 CH<sub>3</sub>). <sup>13</sup>C NMR: (75 MHz, CDCl<sub>3</sub>, δ/ppm): 31.83-18.87 (18 CH<sub>2</sub>), 14.10 (1 CH<sub>3</sub>), 13.52 (3 CH<sub>3</sub>). <sup>31</sup>P NMR: (162 MHz, CDCl<sub>3</sub>, δ/ppm): 32.75. Yield: 44%, 9.34 g. Water content: 348 ppm. Viscosity: 7317 mPa·s (25 °C). Density: 1.006 g/cm<sup>3</sup> (25 °C).

#### [P<sub>44410</sub>]I:

<sup>1</sup>H NMR: (300 MHz, CDCl<sub>3</sub>, δ/ppm): 2.44 (m, 8H, 4 CH<sub>2</sub>), 1.56 (m, 16H, 8 CH<sub>2</sub>), 1.26 (m, 12H, 6 CH<sub>2</sub>), 0.99 (m, 9H, 3 CH<sub>3</sub>), 0.88 (m, 3H, 1 CH<sub>3</sub>). <sup>13</sup>C NMR: (75 MHz, CDCl<sub>3</sub>, δ/ppm): 31.82-19.02 (18 CH<sub>2</sub>), 14.10 (1 CH<sub>3</sub>), 13.54 (3 CH<sub>3</sub>). <sup>31</sup>P NMR: (162 MHz, CDCl<sub>3</sub>, δ/ppm): 32.95. Yield: 82%, 19.35 g. Water content: 98 ppm. Viscosity: 5219 mPa·s (25 °C). Density: 1.090 g/cm<sup>3</sup> (25 °C).

#### [P<sub>66614</sub>]Cl:

<sup>1</sup>H NMR: (300 MHz, CDCl<sub>3</sub>, δ/ppm): 2.47 (m, 8H, 4 CH<sub>2</sub>), 1.51 (m, 16H, 8 CH<sub>2</sub>), 1.26 (m, 32H, 16 CH<sub>2</sub>), 0.89 (m, 12H, 4 CH<sub>3</sub>). <sup>13</sup>C NMR: (75 MHz, CDCl<sub>3</sub>, δ/ppm): 31.93-29.01 (16 CH<sub>2</sub>), 22.70-19.12 (12 CH<sub>2</sub>), 14.13 (1 CH<sub>3</sub>), 13.94 (3 CH<sub>3</sub>). <sup>31</sup>P NMR: (162 MHz, CDCl<sub>3</sub>, δ/ppm): 33.61. Yield: 42%, 4.18 g. Water content: 782 ppm. Viscosity: 2841 mPa·s (25 °C). Density: 0.890 g/cm<sup>3</sup> (25 °C).

#### [N<sub>44410</sub>]Br

<sup>1</sup>H NMR: (300 MHz, CDCl<sub>3</sub>, δ/ppm): 3.39 (m, 8H, 4 CH<sub>2</sub>), 1.69 (m, 8H, 4 CH<sub>2</sub>), 1.47 (m, 8H, 4 CH<sub>2</sub>), 1.26 (m, 12H, 6 CH<sub>2</sub>), 1.01 (m, 9H, 3 CH<sub>3</sub>), 0.88 (m, 3H, 1 CH<sub>3</sub>). <sup>13</sup>C NMR: (75 MHz, CDCl<sub>3</sub>, δ/ppm): 59.14 (4 CH<sub>2</sub>-N), 31.84-19.81 (14 CH<sub>2</sub>), 14.12 (1 CH<sub>3</sub>), 13.74 (3 CH<sub>3</sub>). Yield: 95%, 19.23 g. Melting point: 51 °C.

#### [C<sub>10</sub>(P<sub>444</sub>)<sub>2</sub>][(Br)<sub>2</sub>]

<sup>1</sup>H NMR: (300 MHz, CDCl<sub>3</sub>, δ/ppm): 2.55 (m, 4H, 2 CH<sub>2</sub>), 2.44 (m, 12H, 6 CH<sub>2</sub>), 1.55 (m, 32H, 16 CH<sub>2</sub>), 1.37 (m, 8H, 4 CH<sub>2</sub>), 0.98 (m, 18H, 6 CH<sub>3</sub>). <sup>13</sup>C NMR: (75 MHz, CDCl<sub>3</sub>, δ/ppm): 30.55-28.16 (6 CH<sub>2</sub>), 23.87 (12

CH<sub>2</sub>), 21.69 (2 CH<sub>2</sub>), 19.70-18.89 (8 CH<sub>2</sub>), 13.55 (6 CH<sub>3</sub>). <sup>31</sup>P NMR: (162 MHz, CDCl<sub>3</sub>, δ/ppm): 32.88 (2 PR<sub>4</sub>). Yield: 91%, 14.14 g. Melting temperature: 75.1 °C.

### Tributyldecylphosphonium trihalide ionic liquids:

#### [P<sub>44410</sub>][Cl<sub>3</sub>]:

<sup>1</sup>H NMR: (300 MHz, CDCl<sub>3</sub>, δ/ppm): 2.39 (m, 8H, 4 CH<sub>2</sub>), 1.56 (m, 16H, 8 CH<sub>2</sub>), 1.26 (m, 32H, 16 CH<sub>2</sub>), 0.99 (m, 9H, 3 CH<sub>3</sub>), 0.88 (m, 3H, 1 CH<sub>3</sub>). <sup>13</sup>C NMR: (75 MHz, CDCl<sub>3</sub>, δ/ppm): 31.85-28.98 (16 CH<sub>2</sub>), 24.01-18.78 (12 CH<sub>2</sub>), 14.11 (1 CH<sub>3</sub>), 13.51 (3 CH<sub>3</sub>). <sup>31</sup>P NMR: (162 MHz, CDCl<sub>3</sub>, δ/ppm): 33.07 (1 PR<sub>4</sub>). Yield: 99%, 7.26 g. Viscosity: 400 mPa·s (25 °C). Density: 0.996 g/cm<sup>3</sup> (25 °C).

#### [P<sub>44410</sub>][BrCl<sub>2</sub>]:

<sup>1</sup>H NMR: (300 MHz, CDCl<sub>3</sub>, δ/ppm): 2.28 (m, 8H, 4 CH<sub>2</sub>), 1.58 (m, 16H, 8 CH<sub>2</sub>), 1.28 (m, 12H, 6 CH<sub>2</sub>), 1.01 (m, 9H, 3 CH<sub>3</sub>), 0.88 (m, 3H, 1 CH<sub>3</sub>). <sup>13</sup>C NMR: (75 MHz, CDCl<sub>3</sub>, δ/ppm): 31.85-18.75 (18 CH<sub>2</sub>), 14.12 (1 CH<sub>3</sub>), 13.49 (3 CH<sub>3</sub>). <sup>31</sup>P NMR: (162 MHz, CDCl<sub>3</sub>, δ/ppm): 33.29 (1 PR<sub>4</sub>). Yield: 100%, 9.89 g. Viscosity: 303 mPa·s (25 °C). Density: 1.094 g/cm<sup>3</sup> (25 °C).

#### [P<sub>44410</sub>][ClBr<sub>2</sub>]:

<sup>1</sup>H NMR: (300 MHz, CDCl<sub>3</sub>, δ/ppm): 2.29 (m, 8H, 4 CH<sub>2</sub>), 1.59 (m, 16H, 8 CH<sub>2</sub>), 1.28 (m, 12H, 6 CH<sub>2</sub>), 1.01 (m, 9H, 3 CH<sub>3</sub>), 0.88 (m, 3H, 1 CH<sub>3</sub>). <sup>13</sup>C NMR: (75 MHz, CDCl<sub>3</sub>, δ/ppm): 31.86-18.86 (18 CH<sub>2</sub>), 14.13 (1 CH<sub>3</sub>), 13.53 (3 CH<sub>3</sub>). <sup>31</sup>P NMR: (162 MHz, CDCl<sub>3</sub>, δ/ppm): 33.01 (1 PR<sub>4</sub>). Yield: 100%, 12.94 g. Viscosity: 376 mPa·s (25 °C). Density: 1.169 g/cm<sup>3</sup> (25 °C).

#### [P<sub>44410</sub>][Br<sub>3</sub>]:

<sup>1</sup>H NMR: (300 MHz, CDCl<sub>3</sub>, δ/ppm): 2.28 (m, 8H, 4 CH<sub>2</sub>), 1.60 (m, 16H, 8 CH<sub>2</sub>), 1.28 (m, 12H, 6 CH<sub>2</sub>), 1.02 (m, 9H, 3 CH<sub>3</sub>), 0.88 (m, 3H, 1 CH<sub>3</sub>). <sup>13</sup>C NMR: (75 MHz, CDCl<sub>3</sub>, δ/ppm): 31.87-18.85 (18 CH<sub>2</sub>), 14.14 (1 CH<sub>3</sub>), 13.56 (3 CH<sub>3</sub>). <sup>31</sup>P NMR: (162 MHz, CDCl<sub>3</sub>, δ/ppm): 33.39 (1 PR<sub>4</sub>). Yield: 100%, 11.71 g. Viscosity: 382 mPa·s (25 °C). Density: 1.253 g/cm<sup>3</sup> (25 °C).

#### [P<sub>44410</sub>][IBr<sub>2</sub>]:

<sup>1</sup>H NMR: (300 MHz, CDCl<sub>3</sub>, δ/ppm): 2.27 (m, 8H, 4 CH<sub>2</sub>), 1.60 (m, 16H, 8 CH<sub>2</sub>), 1.28 (m, 12H, 6 CH<sub>2</sub>), 1.03 (m, 9H, 3 CH<sub>3</sub>), 0.88 (m, 3H, 1 CH<sub>3</sub>). <sup>13</sup>C NMR: (75 MHz, CDCl<sub>3</sub>, δ/ppm): 31.87-19.07 (18 CH<sub>2</sub>), 14.14 (1 CH<sub>3</sub>), 13.57 (3 CH<sub>3</sub>). <sup>31</sup>P NMR: (162 MHz, CDCl<sub>3</sub>, δ/ppm): 33.08 (1 PR<sub>4</sub>). Yield: 99%, 9.90 g. Viscosity: 381 mPa·s (25 °C). Density: 1.325 g/cm<sup>3</sup> (25 °C).

#### [P<sub>44410</sub>][BrI<sub>2</sub>]:

<sup>1</sup>H NMR: (300 MHz, CDCl<sub>3</sub>, δ/ppm): 2.27 (m, 8H, 4 CH<sub>2</sub>), 1.60 (m, 16H, 8 CH<sub>2</sub>), 1.28 (m, 12H, 6 CH<sub>2</sub>), 1.03 (m, 9H, 3 CH<sub>3</sub>), 0.88 (m, 3H, 1 CH<sub>3</sub>). <sup>13</sup>C NMR: (75 MHz, CDCl<sub>3</sub>, δ/ppm): 31.88-19.07 (18 CH<sub>2</sub>), 14.16 (1 CH<sub>3</sub>), 13.66 (3 CH<sub>3</sub>). <sup>31</sup>P NMR: (162 MHz, CDCl<sub>3</sub>, δ/ppm): 33.09 (1 PR<sub>4</sub>). Yield: 100%, 11.74 g. Viscosity: 358 mPa·s (25 °C). Density: 1.433 g/cm<sup>3</sup> (25 °C).

#### [P<sub>44410</sub>][I<sub>3</sub>]:

<sup>1</sup>H NMR: (300 MHz, CDCl<sub>3</sub>, δ/ppm): 2.27 (m, 8H, 4 CH<sub>2</sub>), 1.62 (m, 16H, 8 CH<sub>2</sub>), 1.29 (m, 12H, 6 CH<sub>2</sub>), 1.04 (m, 9H, 3 CH<sub>3</sub>), 0.88 (m, 3H, 1 CH<sub>3</sub>). <sup>13</sup>C NMR: (75 MHz, CDCl<sub>3</sub>, δ/ppm): 31.88-19.31 (18 CH<sub>2</sub>), 14.16 (1 CH<sub>3</sub>), 13.70 (3 CH<sub>3</sub>). <sup>31</sup>P NMR: (162 MHz, CDCl<sub>3</sub>, δ/ppm): 33.15 (1 PR<sub>4</sub>). Yield: 100%, 14.49 g. Viscosity: 371 mPa·s (25 °C). Density: 1.469 g/cm<sup>3</sup> (25 °C).

## Trihalide ILs with other cations

### [P<sub>66614</sub>][Cl<sub>3</sub>]:

<sup>1</sup>H NMR: (300 MHz, CDCl<sub>3</sub>, δ/ppm): 2.46 (m, 8H, 4 CH<sub>2</sub>), 1.51 (m, 16H, 8 CH<sub>2</sub>), 1.26 (m, 32H, 16 CH<sub>2</sub>), 0.90 (m, 12H, 4 CH<sub>3</sub>) <sup>13</sup>C NMR: (75 MHz, CDCl<sub>3</sub>, δ/ppm): 31.91-18.98 (28 CH<sub>2</sub>), 14.12 (1 CH<sub>3</sub>), 13.94 (3 CH<sub>3</sub>). <sup>31</sup>P NMR: (162 MHz, CDCl<sub>3</sub>, δ/ppm): 33.22 (1 PR<sub>4</sub>). Yield: 99%, 10.88 g. Viscosity: 590 mPa·s (25 °C). Density: 0.954 g/cm<sup>3</sup> (25 °C).

### [P<sub>66614</sub>][ClBr<sub>2</sub>]:

<sup>1</sup>H NMR: (300 MHz, CDCl<sub>3</sub>, δ/ppm): 2.29 (m, 8H, 4 CH<sub>2</sub>), 1.55 (m, 16H, 8 CH<sub>2</sub>), 1.26 (m, 32H, 16 CH<sub>2</sub>), 0.91 (m, 12H, 4 CH<sub>3</sub>) <sup>13</sup>C NMR: (75 MHz, CDCl<sub>3</sub>, δ/ppm): 31.93-19.10 (28 CH<sub>2</sub>), 14.13 (1 CH<sub>3</sub>), 14.00 (3 CH<sub>3</sub>). <sup>31</sup>P NMR: (162 MHz, CDCl<sub>3</sub>, δ/ppm): 33.10 (1 PR<sub>4</sub>). Yield: 100%, 10.19 g. Viscosity: 420 mPa·s (25 °C). Density: 1.080 g/cm<sup>3</sup> (25 °C).

### [N<sub>44410</sub>][Br<sub>3</sub>]:

<sup>1</sup>H NMR: (300 MHz, CDCl<sub>3</sub>, δ/ppm): 3.30 (m, 8H, 4 CH<sub>2</sub>), 1.72 (m, 8H, 4 CH<sub>2</sub>), 1.50 (m, 8H, 4 CH<sub>2</sub>), 1.27 (m, 12H, 6 CH<sub>2</sub>), 1.05 (m, 9H, 3 CH<sub>3</sub>), 0.88 (m, 3H, 1 CH<sub>3</sub>). <sup>13</sup>C NMR: (75 MHz, CDCl<sub>3</sub>, δ/ppm): 59.17 (4 CH<sub>2</sub>-N), 31.86-19.89 (14 CH<sub>2</sub>), 14.14 (1 CH<sub>3</sub>), 13.80 (3 CH<sub>3</sub>). Yield: 100%, 8.50 g. Viscosity: 1201 mPa·s (25 °C). Density: 1.255 g/cm<sup>3</sup> (25 °C).

### [C<sub>10</sub>(P<sub>444</sub>)<sub>2</sub>][(Br<sub>3</sub>)<sub>2</sub>]:

<sup>1</sup>H NMR: (300 MHz, CDCl<sub>3</sub>, δ/ppm): 2.29 (m, 16H, 8 CH<sub>2</sub>), 1.59 (m, 32H, 16 CH<sub>2</sub>), 1.38 (m, 8H, 4 CH<sub>2</sub>), 1.01 (m, 18H, 6 CH<sub>3</sub>). <sup>13</sup>C NMR: (75 MHz, CDCl<sub>3</sub>, δ/ppm): 30.53-28.05 (6 CH<sub>2</sub>), 24.00 (12 CH<sub>2</sub>), 21.69 (2 CH<sub>2</sub>), 19.71-18.92 (8 CH<sub>2</sub>), 13.58 (6 CH<sub>3</sub>). <sup>31</sup>P NMR: (162 MHz, CDCl<sub>3</sub>, δ/ppm): 32.98 (2 PR<sub>4</sub>). Yield: 100%, 10.24 g. Melting temperature: 65.6 °C

## Raman spectra

All the Raman spectra were recorded on the pure ILs, but due to the increasing signal scattering with heavier halogen atoms, the laser power had to be lowered. Below the spectra and an overview of the distinctive trihalide signals can be found, together with the used laser power.

[P<sub>44410</sub>][Cl<sub>3</sub>]: 300 mW

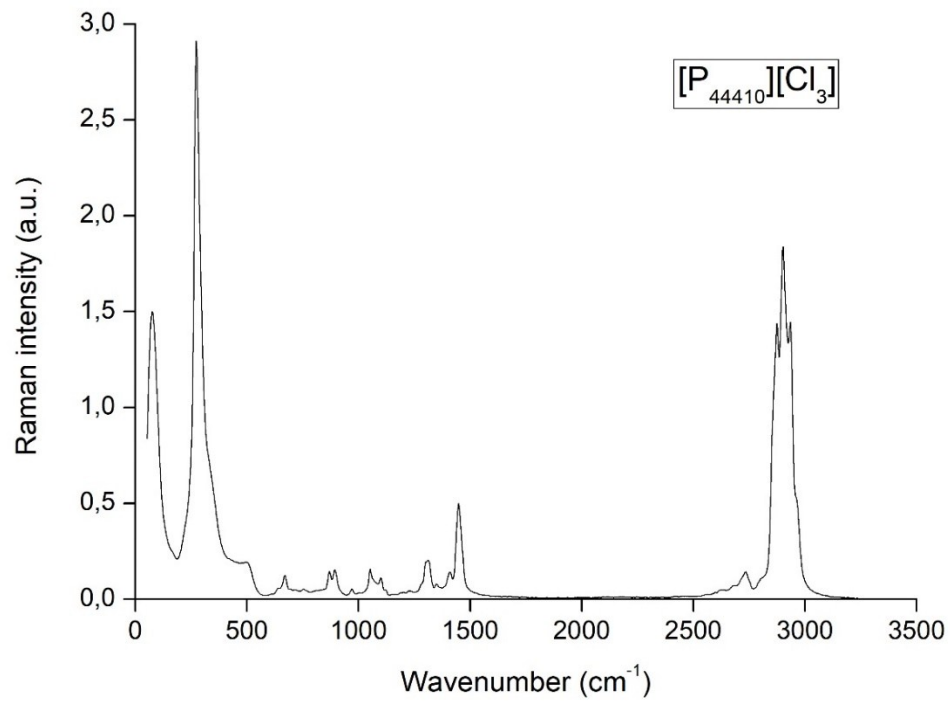

[P<sub>44410</sub>][BrCl<sub>2</sub>]: 500 mW

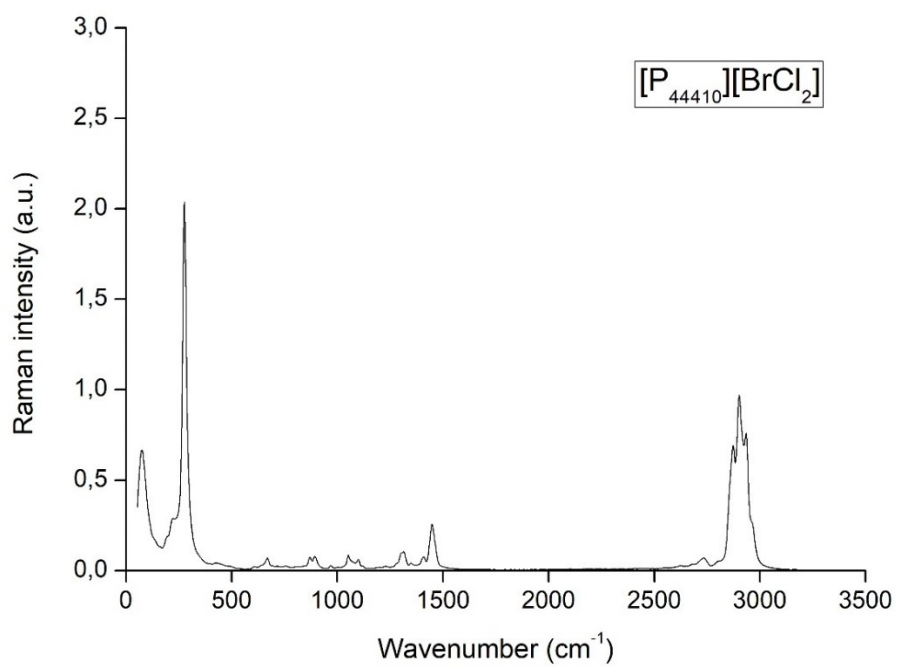

[P<sub>44410</sub>][ClBr<sub>2</sub>]: 500 mW

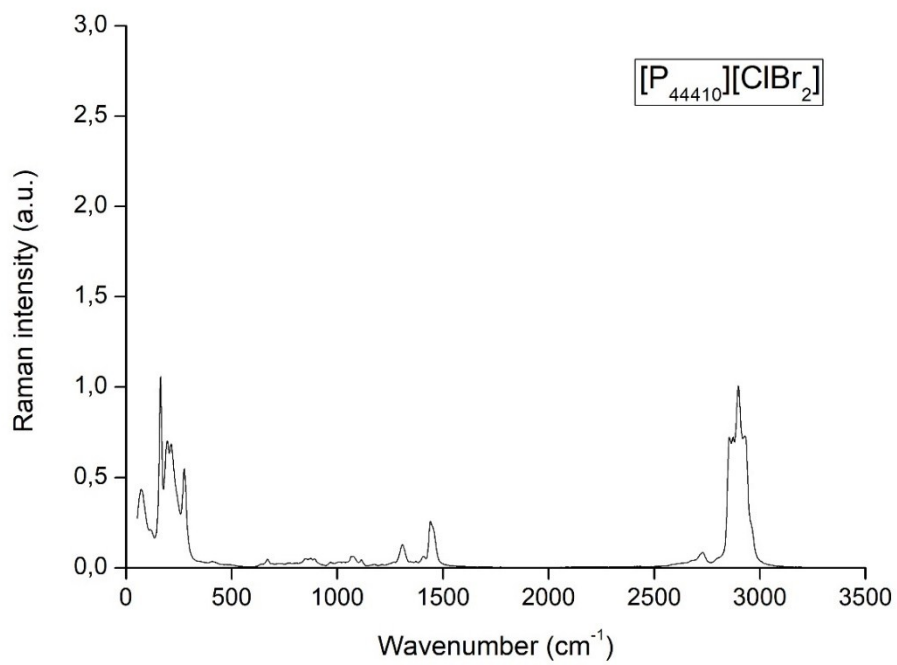

[P<sub>44410</sub>][Br<sub>3</sub>]: 500 mW

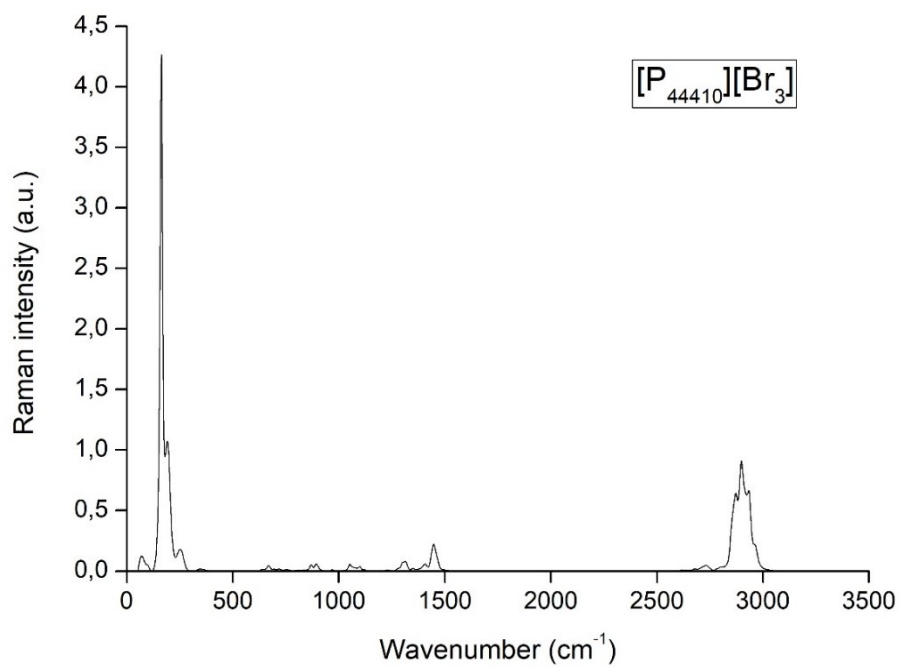

[P<sub>44410</sub>][Br<sub>2</sub>]: 250 mW

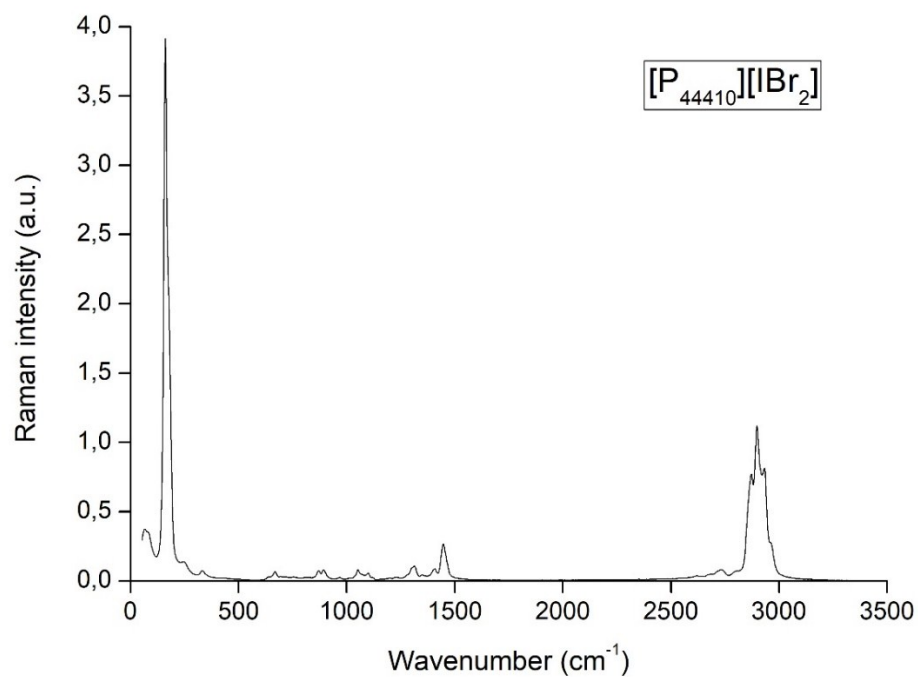



[P<sub>44410</sub>][BrI<sub>2</sub>]: 100 mW

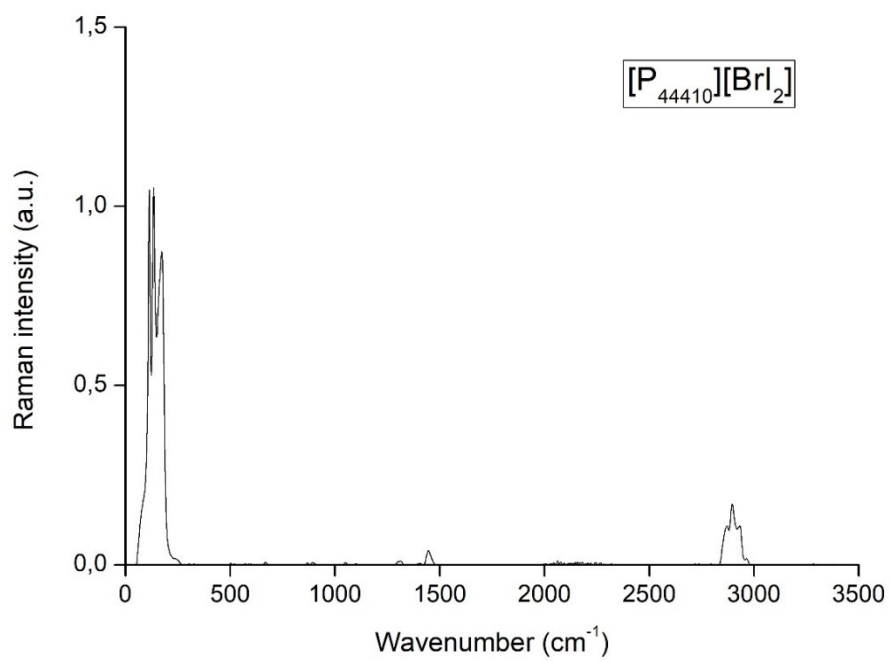

[P<sub>44410</sub>][I<sub>3</sub>]: 50 mW

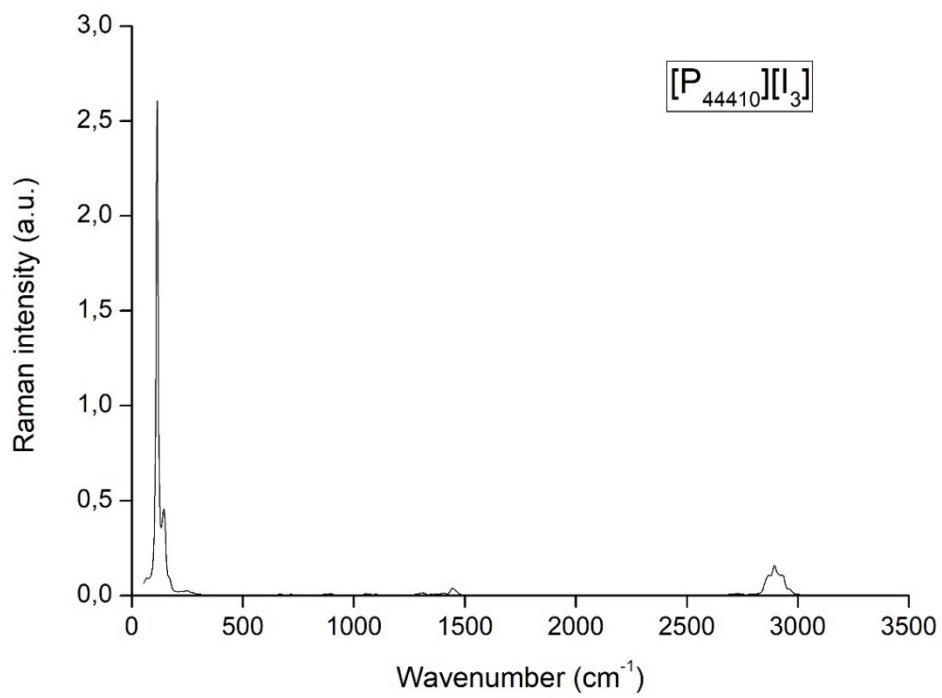

[P<sub>66614</sub>][Cl<sub>3</sub>]: 500 mW

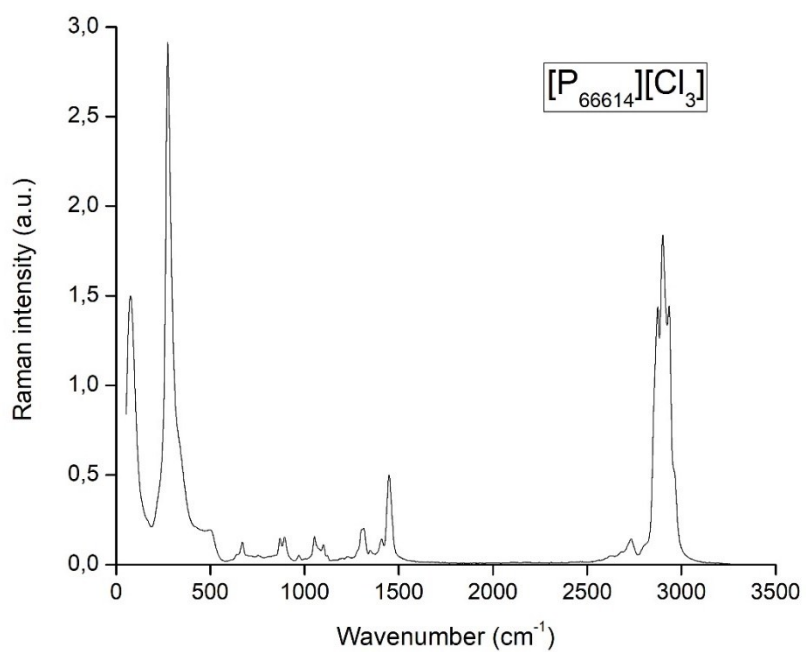

[P<sub>66614</sub>][ClBr<sub>2</sub>]: 500 mW

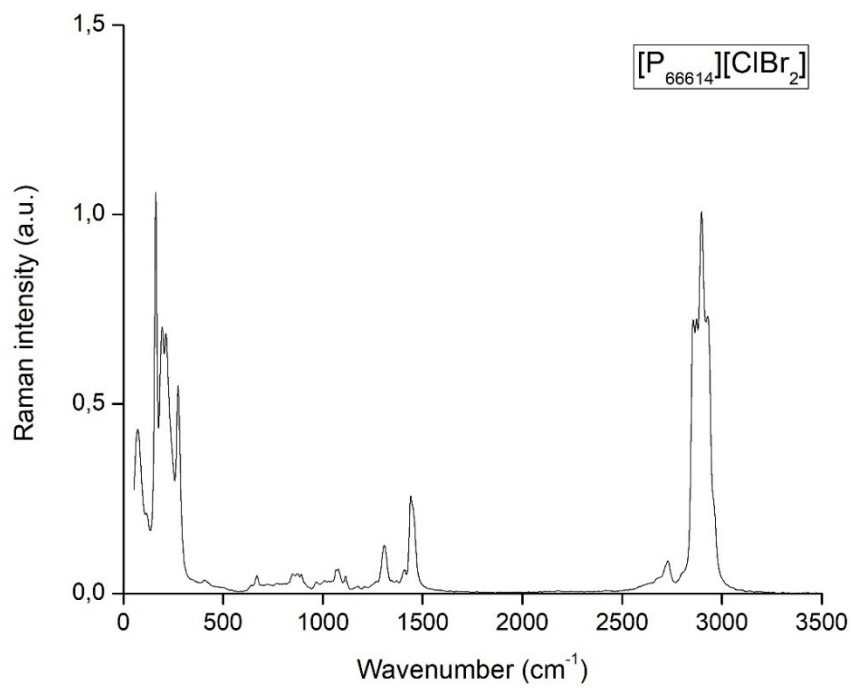

[N<sub>44410</sub>][Br<sub>3</sub>]: 500 mW

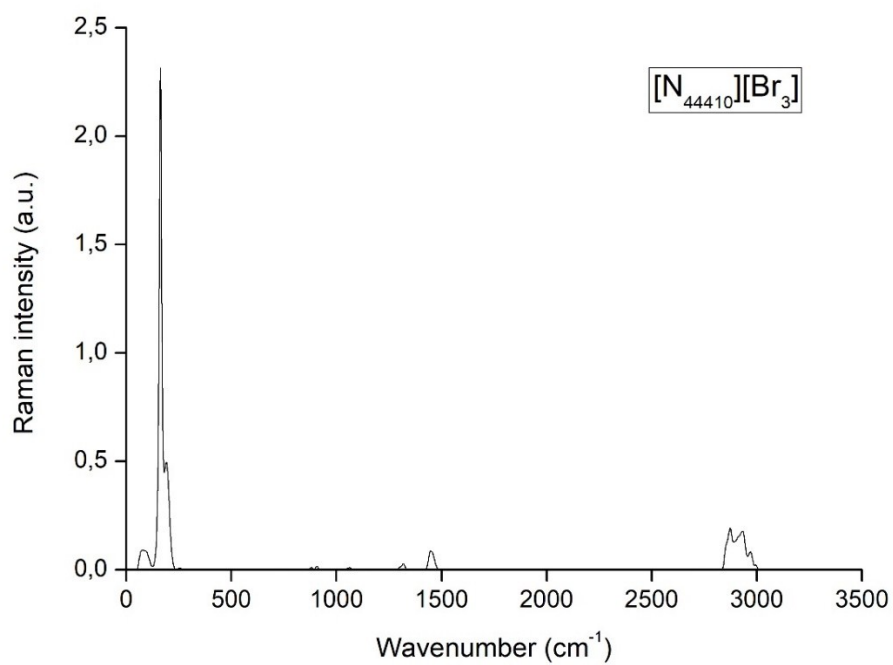

[C<sub>10</sub>(P<sub>444</sub>)<sub>2</sub>][(Br<sub>3</sub>)<sub>2</sub>]: 500 mW

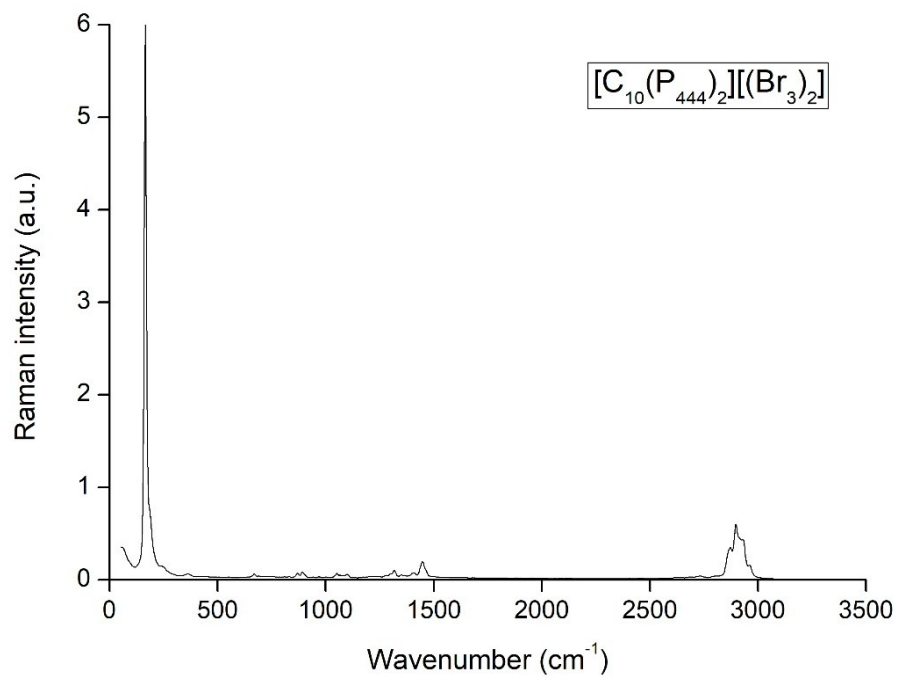

# NMR spectra

[P<sub>44410</sub>][Cl<sub>3</sub>]

<sup>1</sup>H NMR

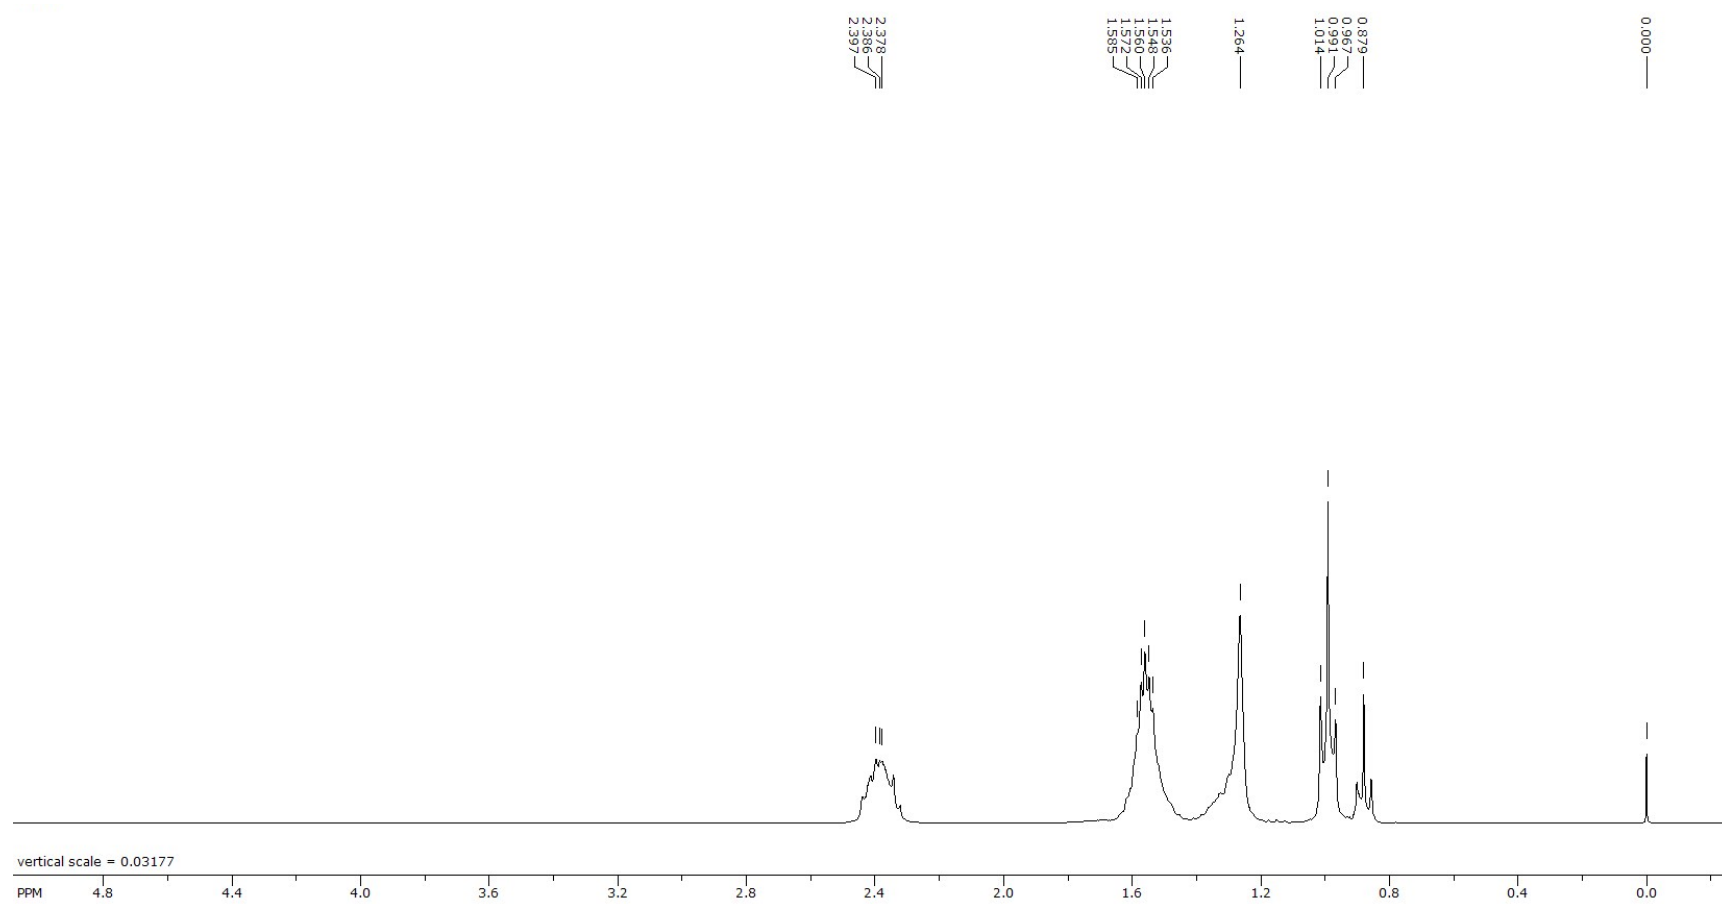

<sup>13</sup>C NMR

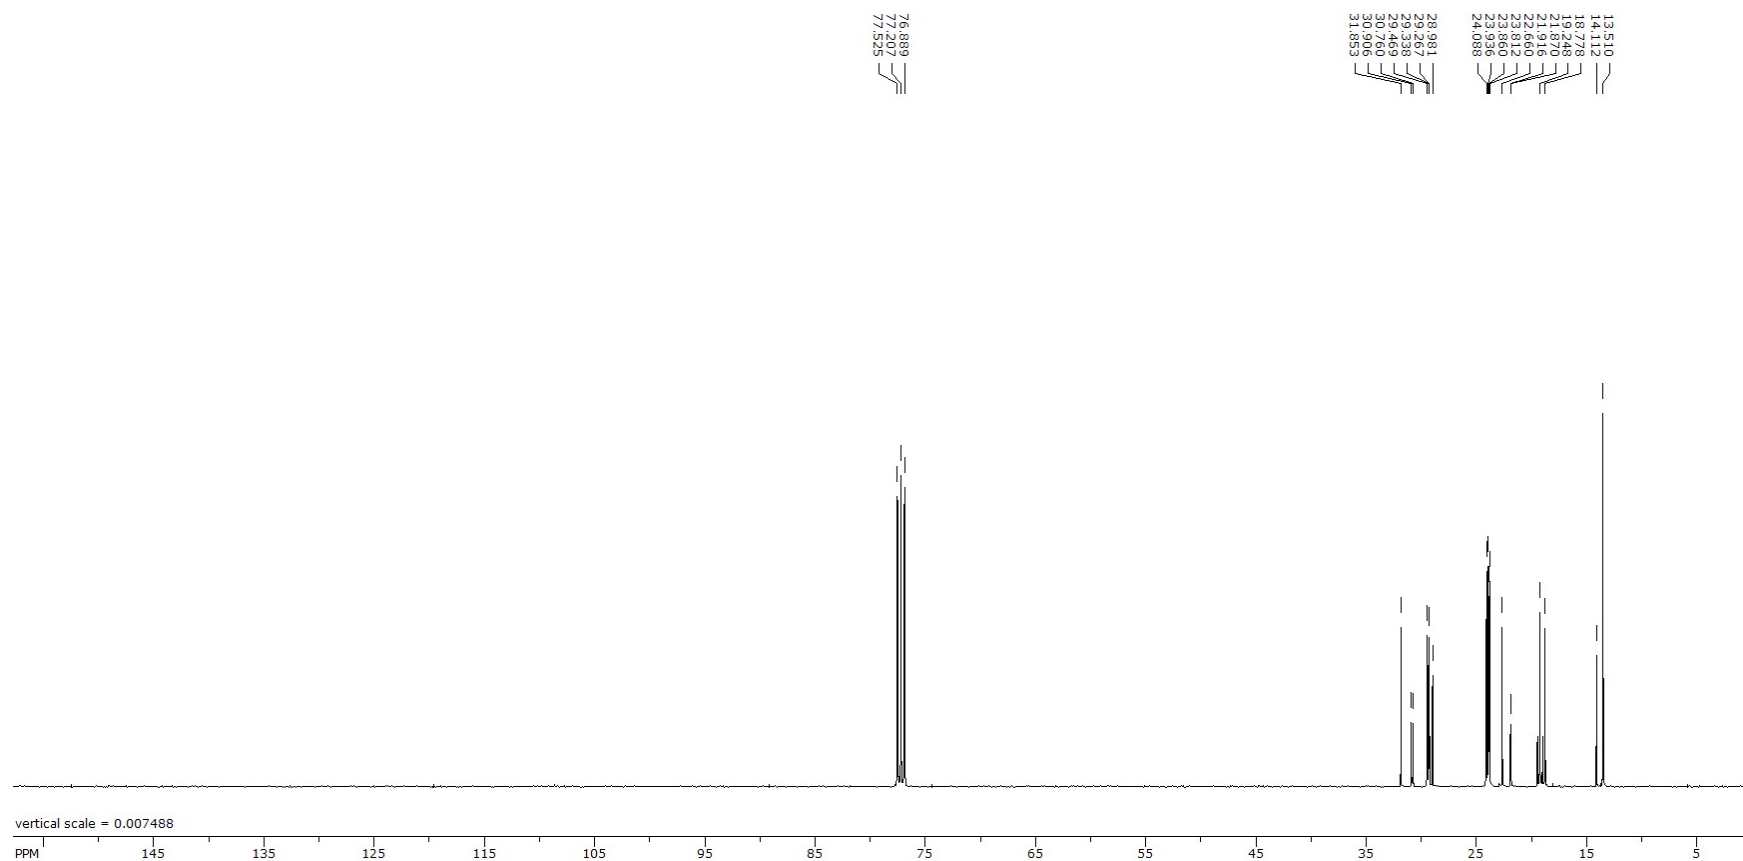

<sup>31</sup>P NMR

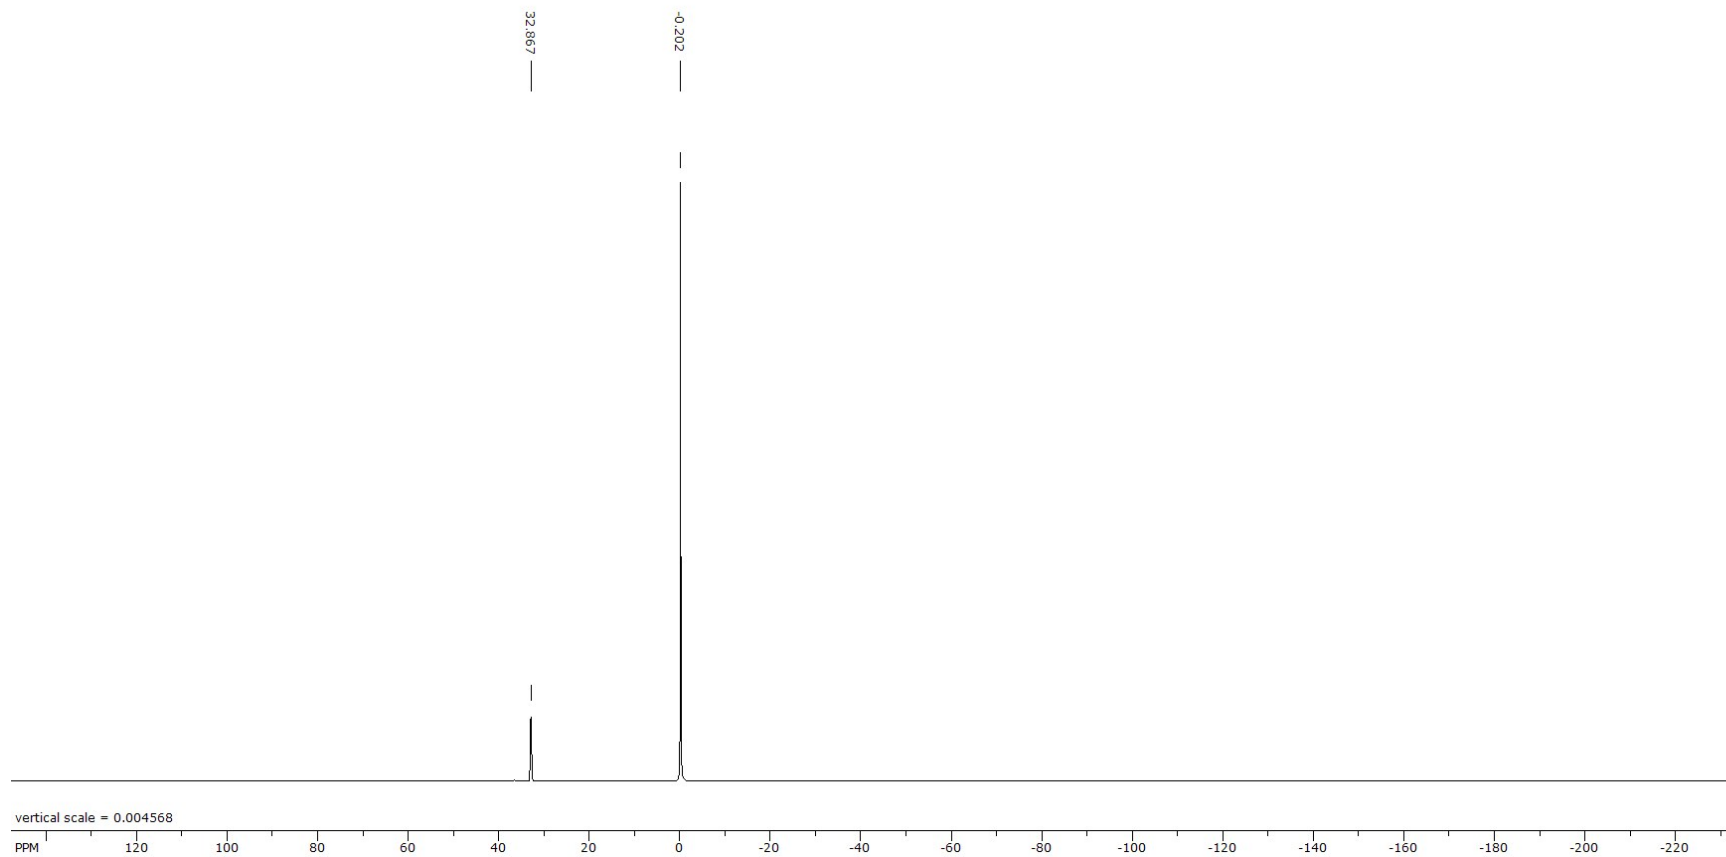

[P<sub>44410</sub>][BrCl<sub>2</sub>]

<sup>1</sup>H NMR

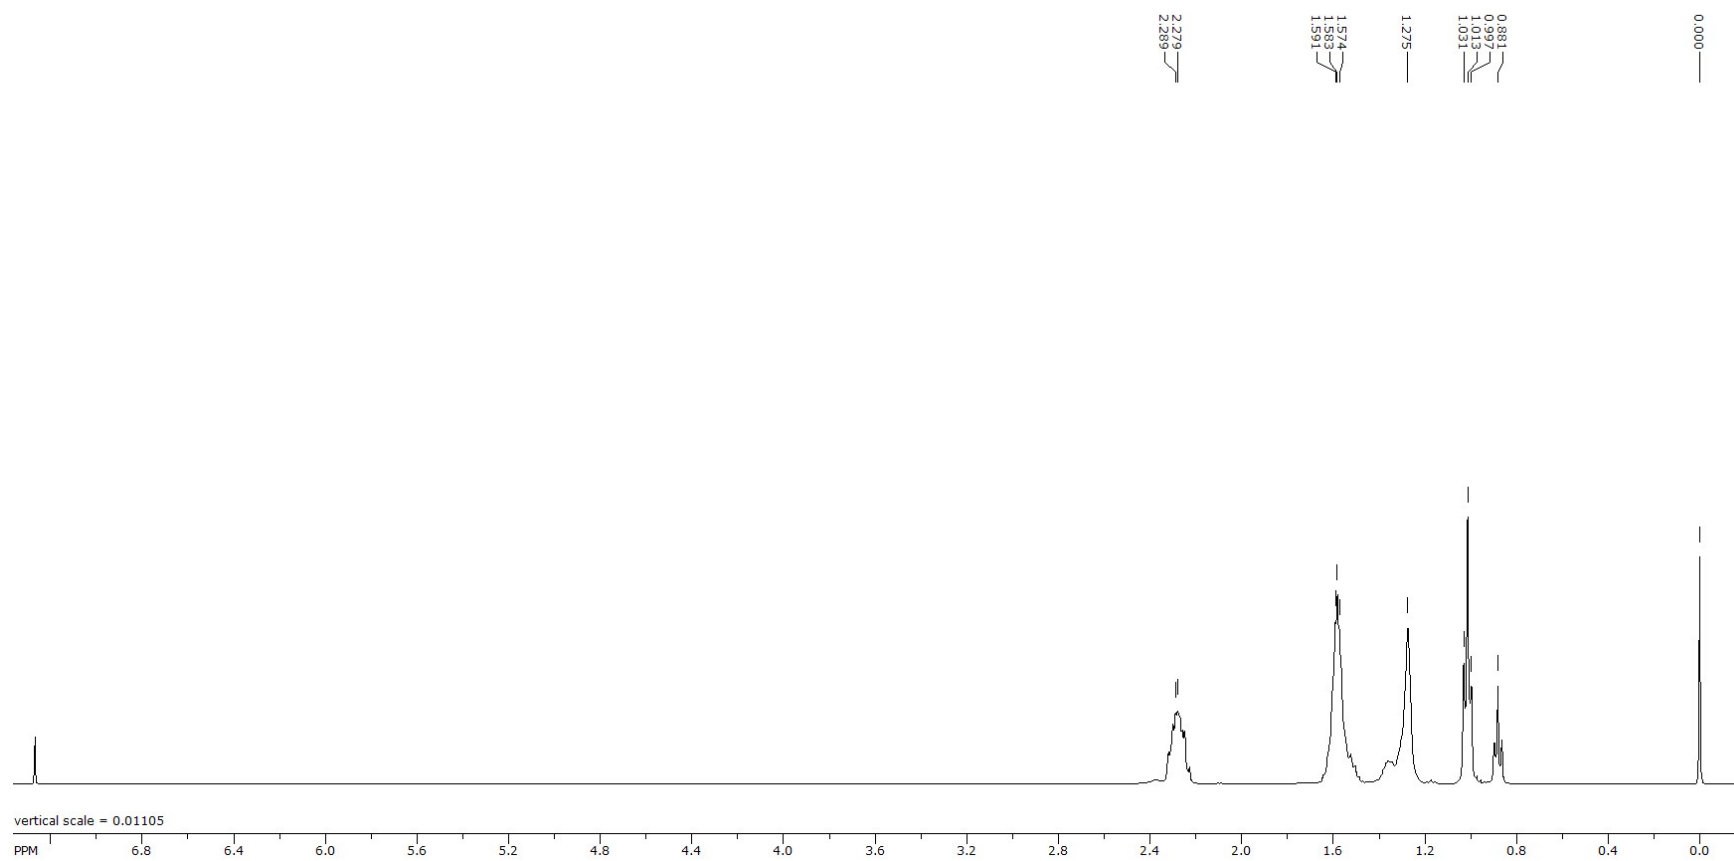

# <sup>13</sup>C NMR

no title

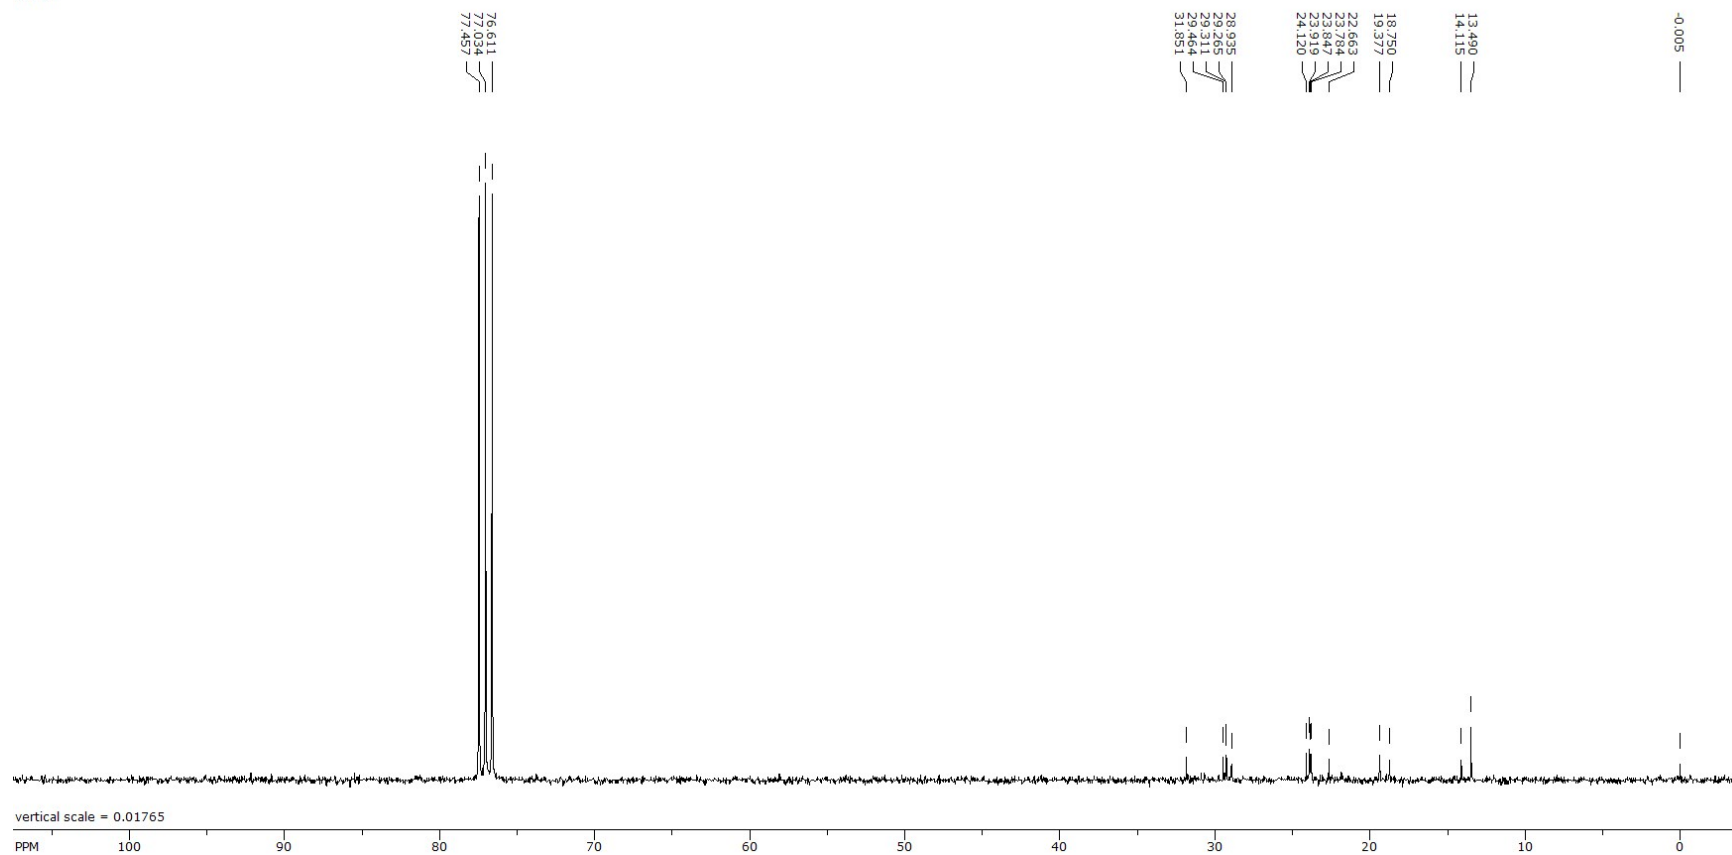



<sup>31</sup>P NMR

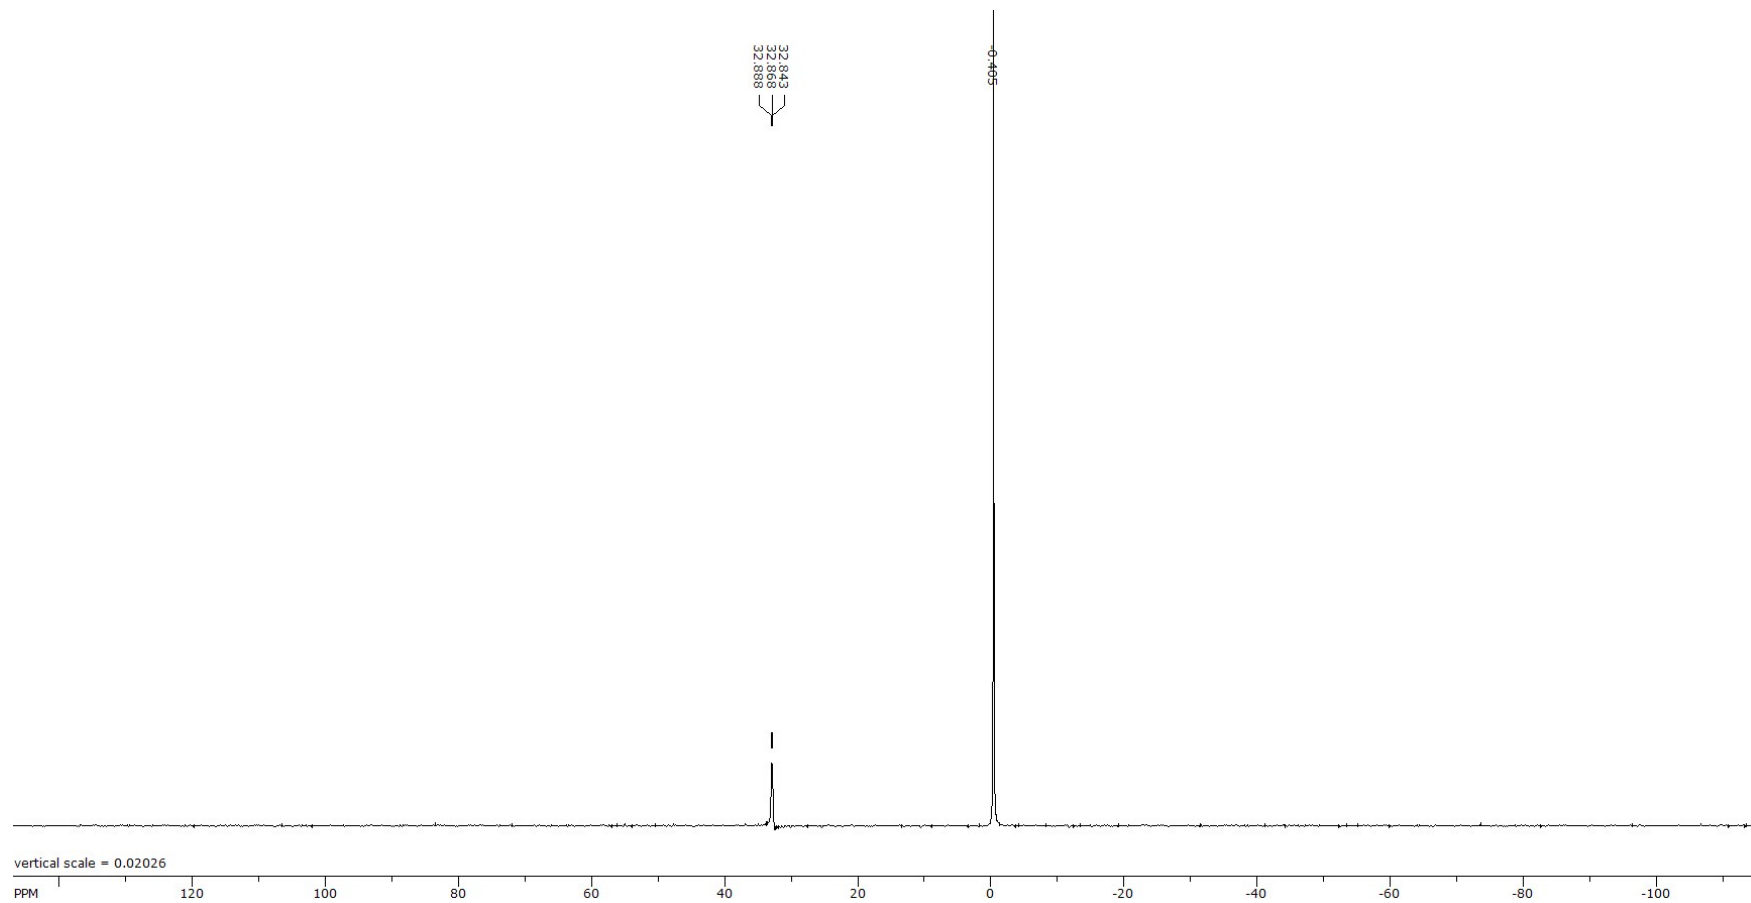

[P<sub>44410</sub>][ClBr<sub>2</sub>]

<sup>1</sup>H NMR

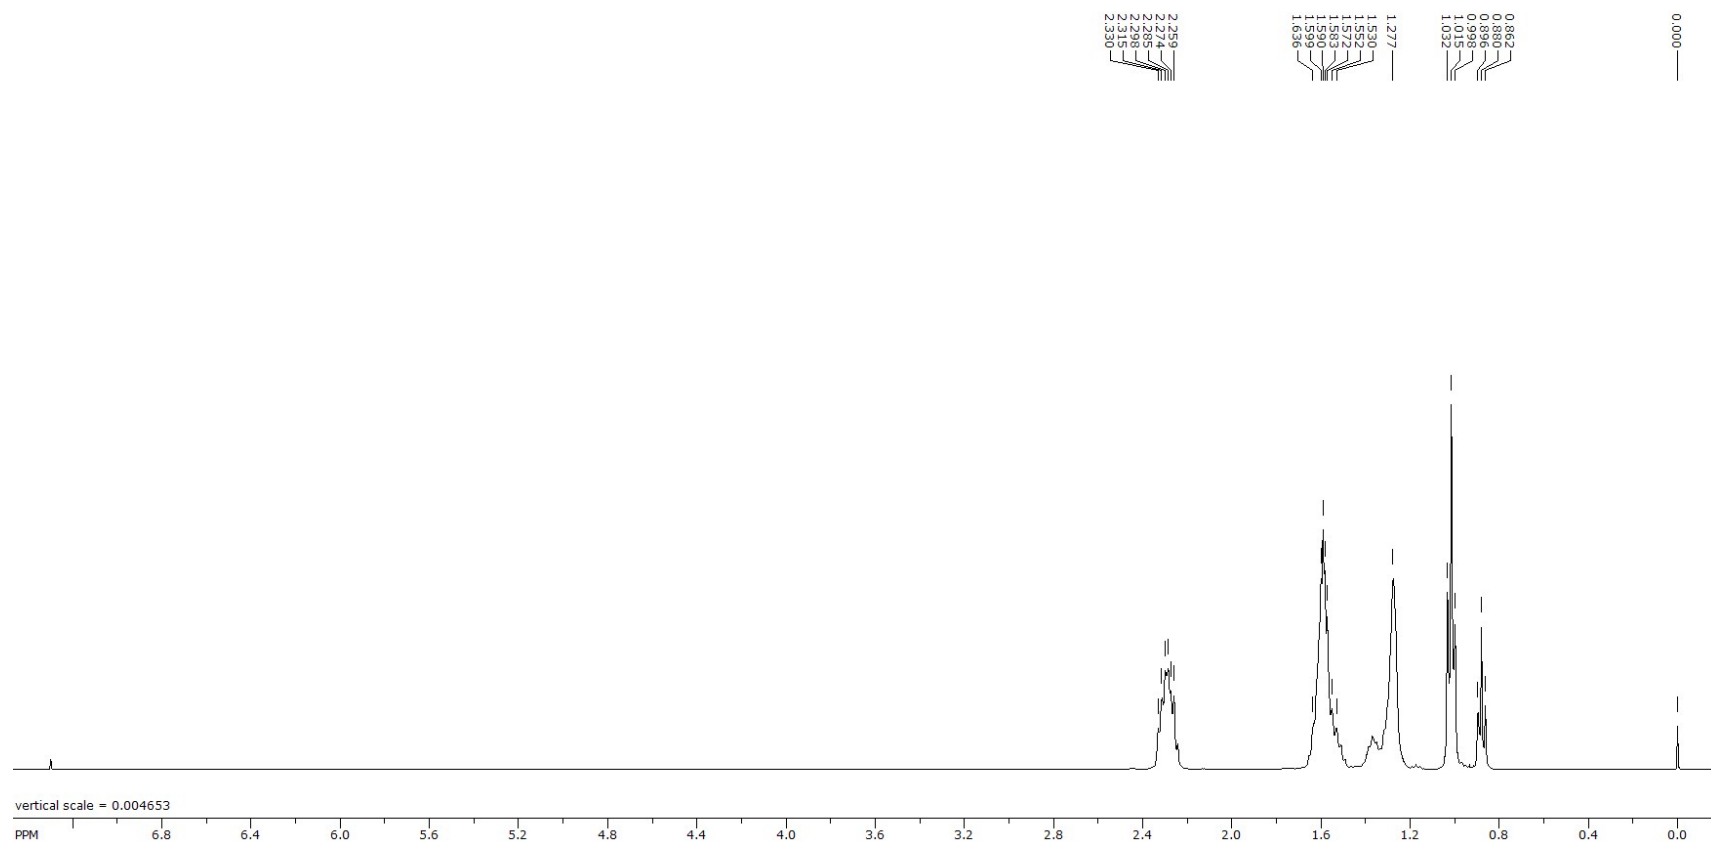

<sup>13</sup>C NMR

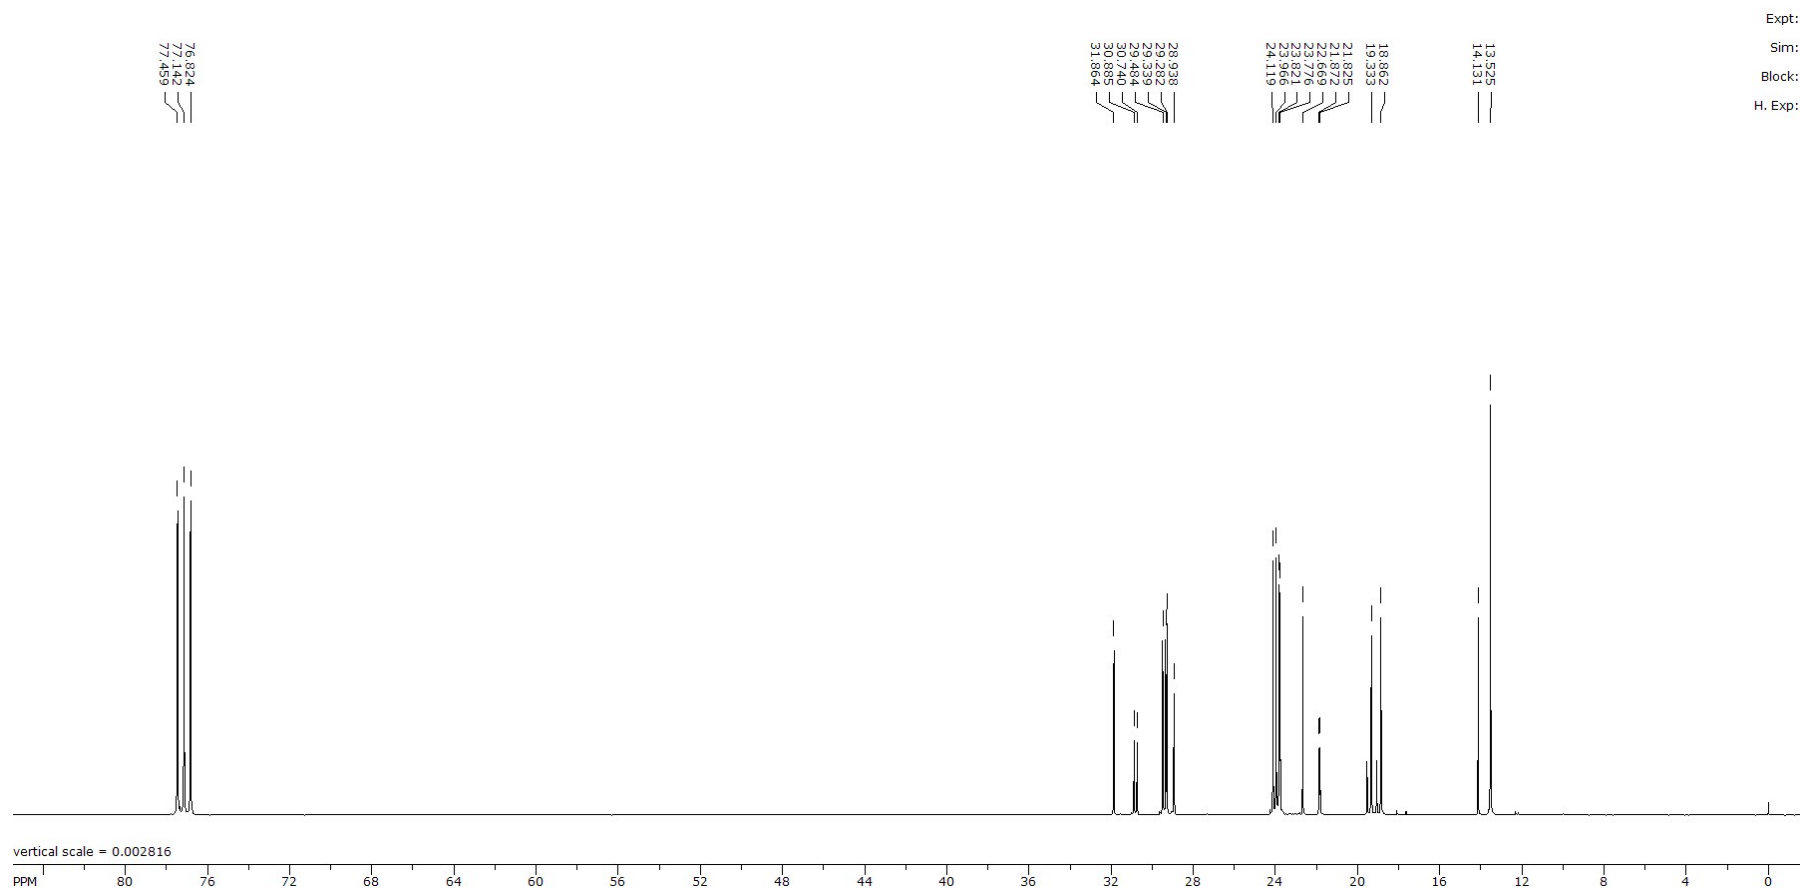

Expt:  
Sim:  
Block:  
H. Exp:

<sup>31</sup>P NMR

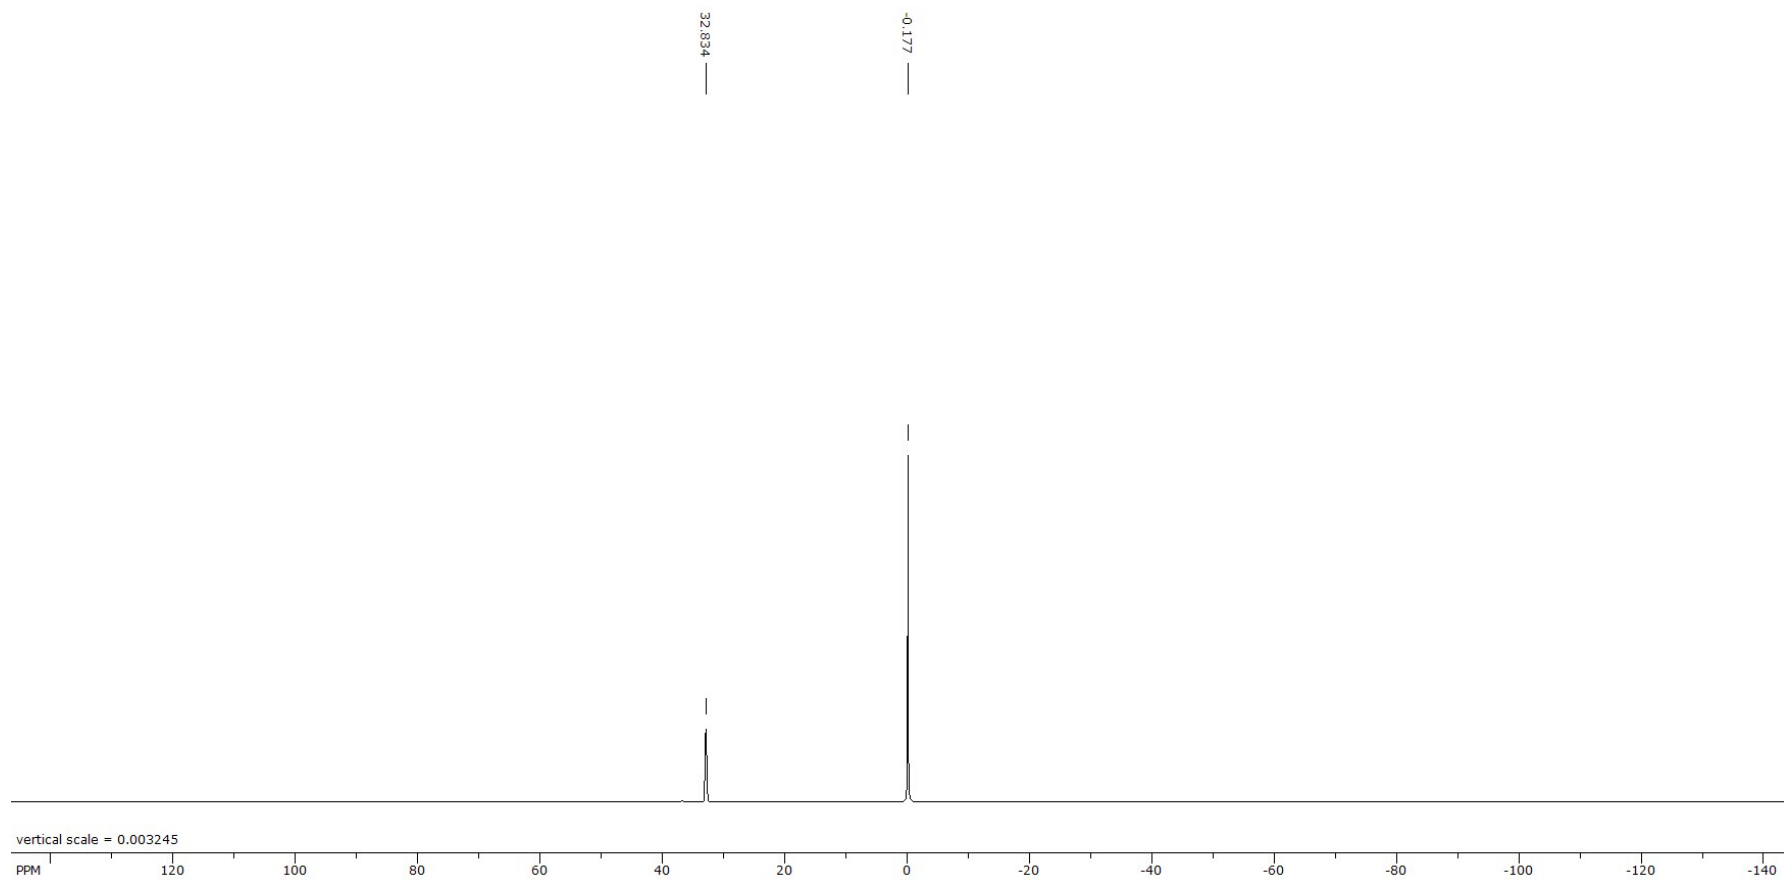

[P<sub>44410</sub>][Br<sub>3</sub>]

<sup>1</sup>H NMR

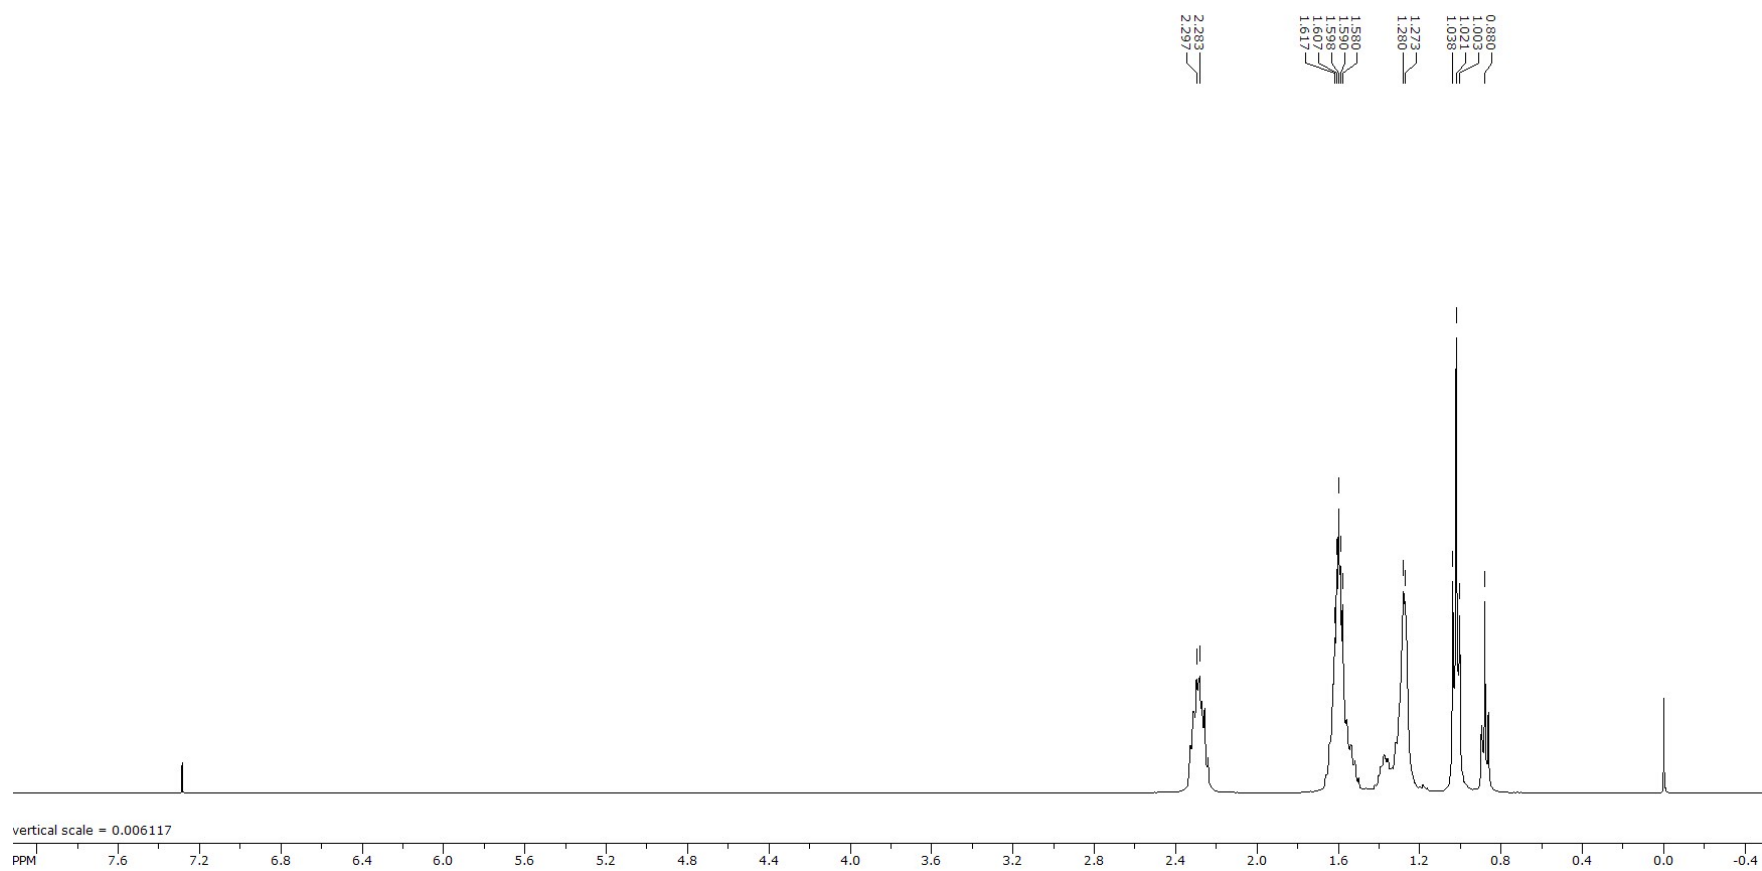

<sup>13</sup>C NMR

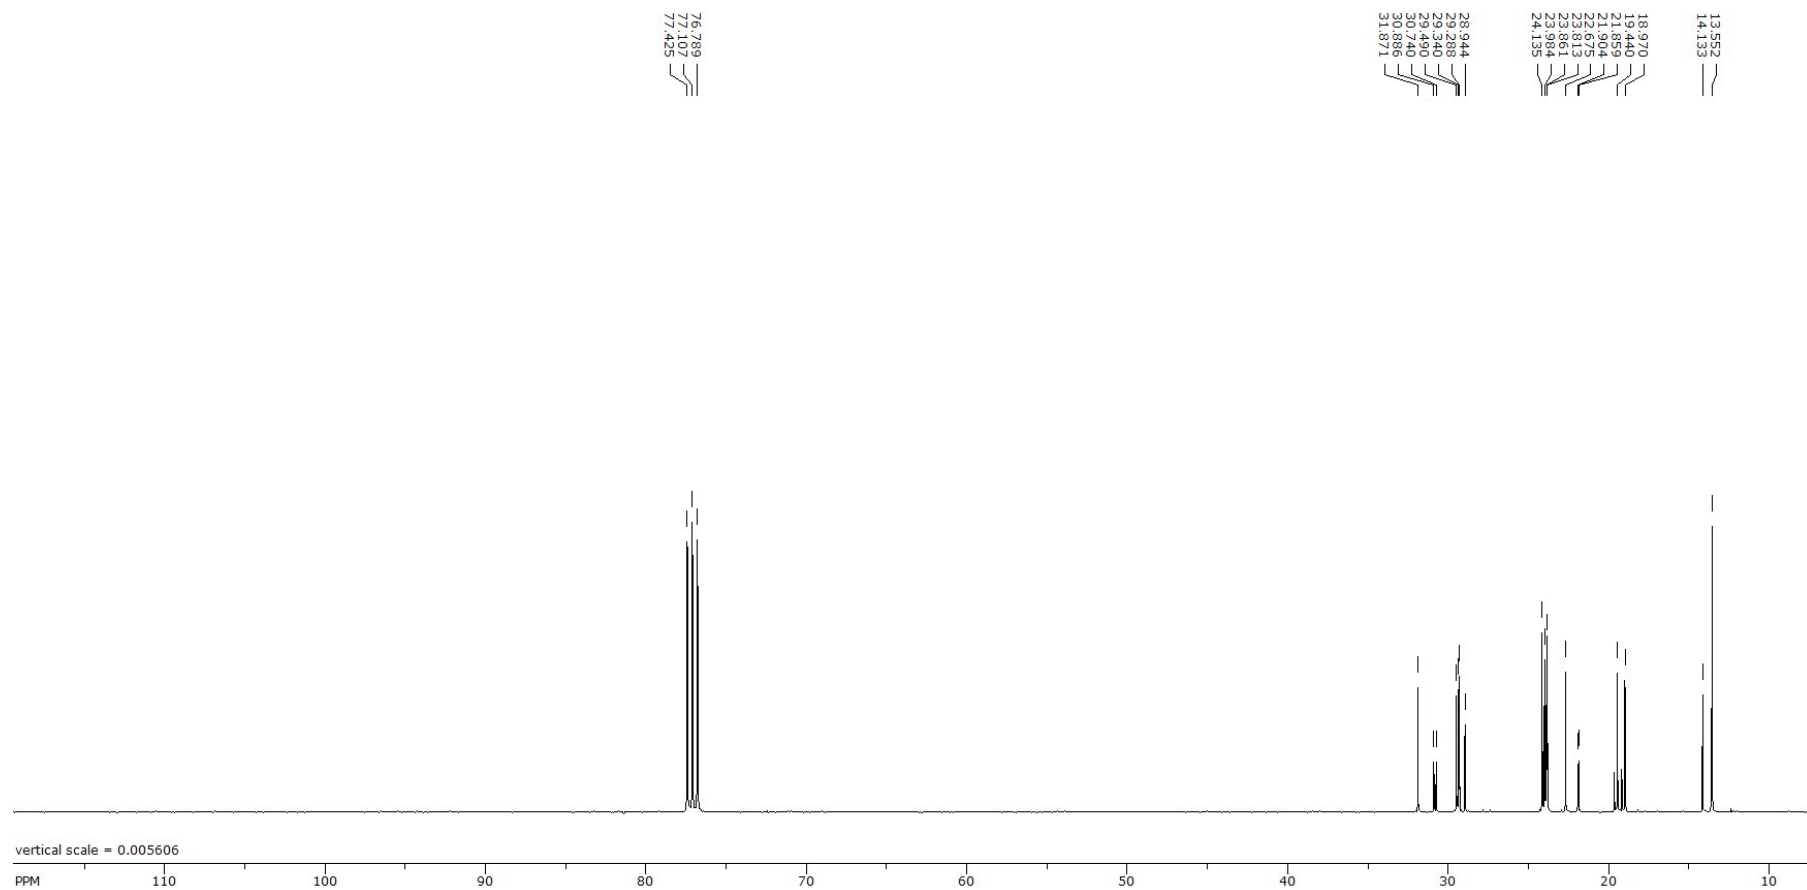

<sup>31</sup>P NMR

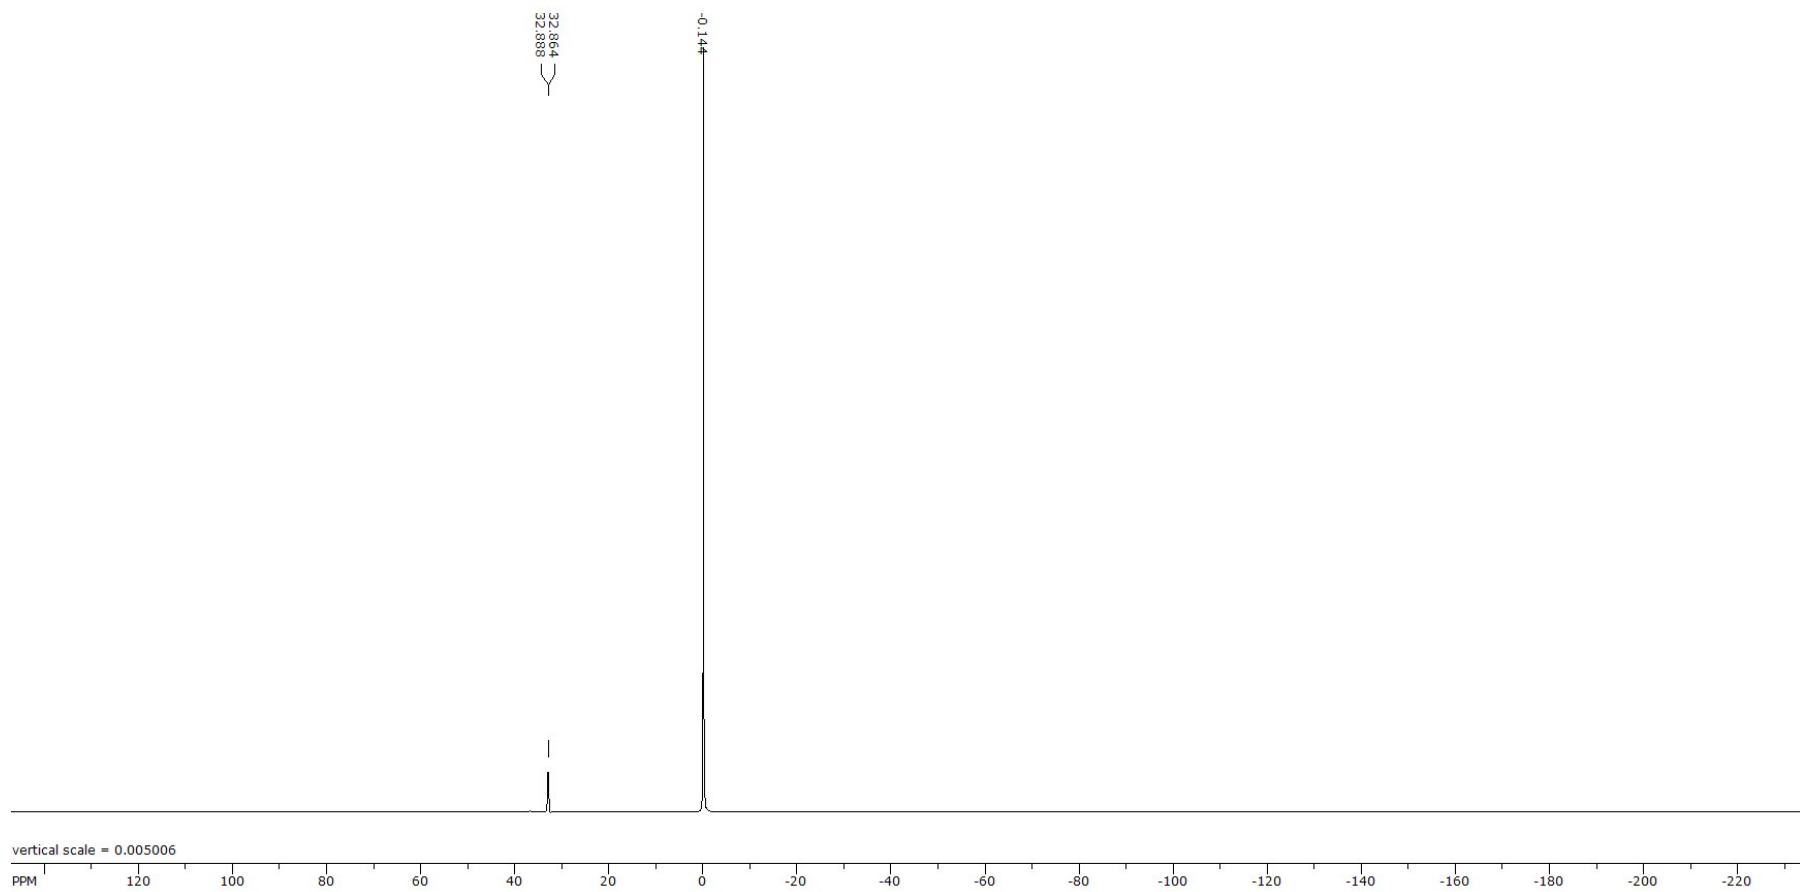

[P<sub>44410</sub>][Br<sub>2</sub>]

<sup>1</sup>H NMR

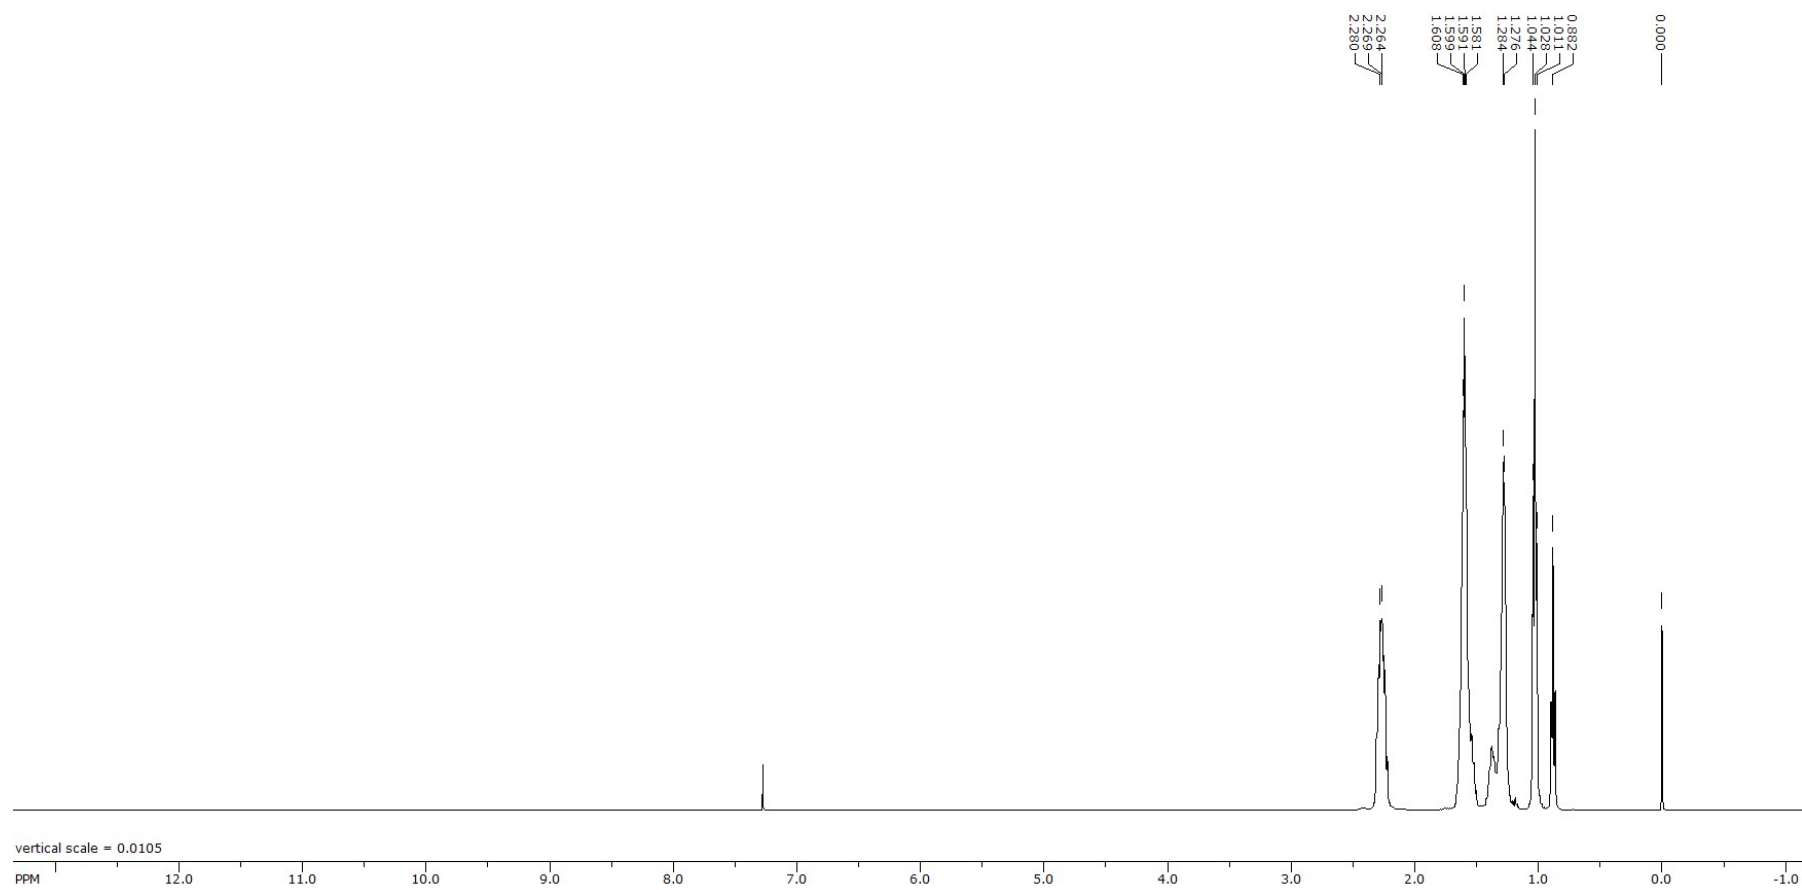



# <sup>13</sup>C NMR

no title

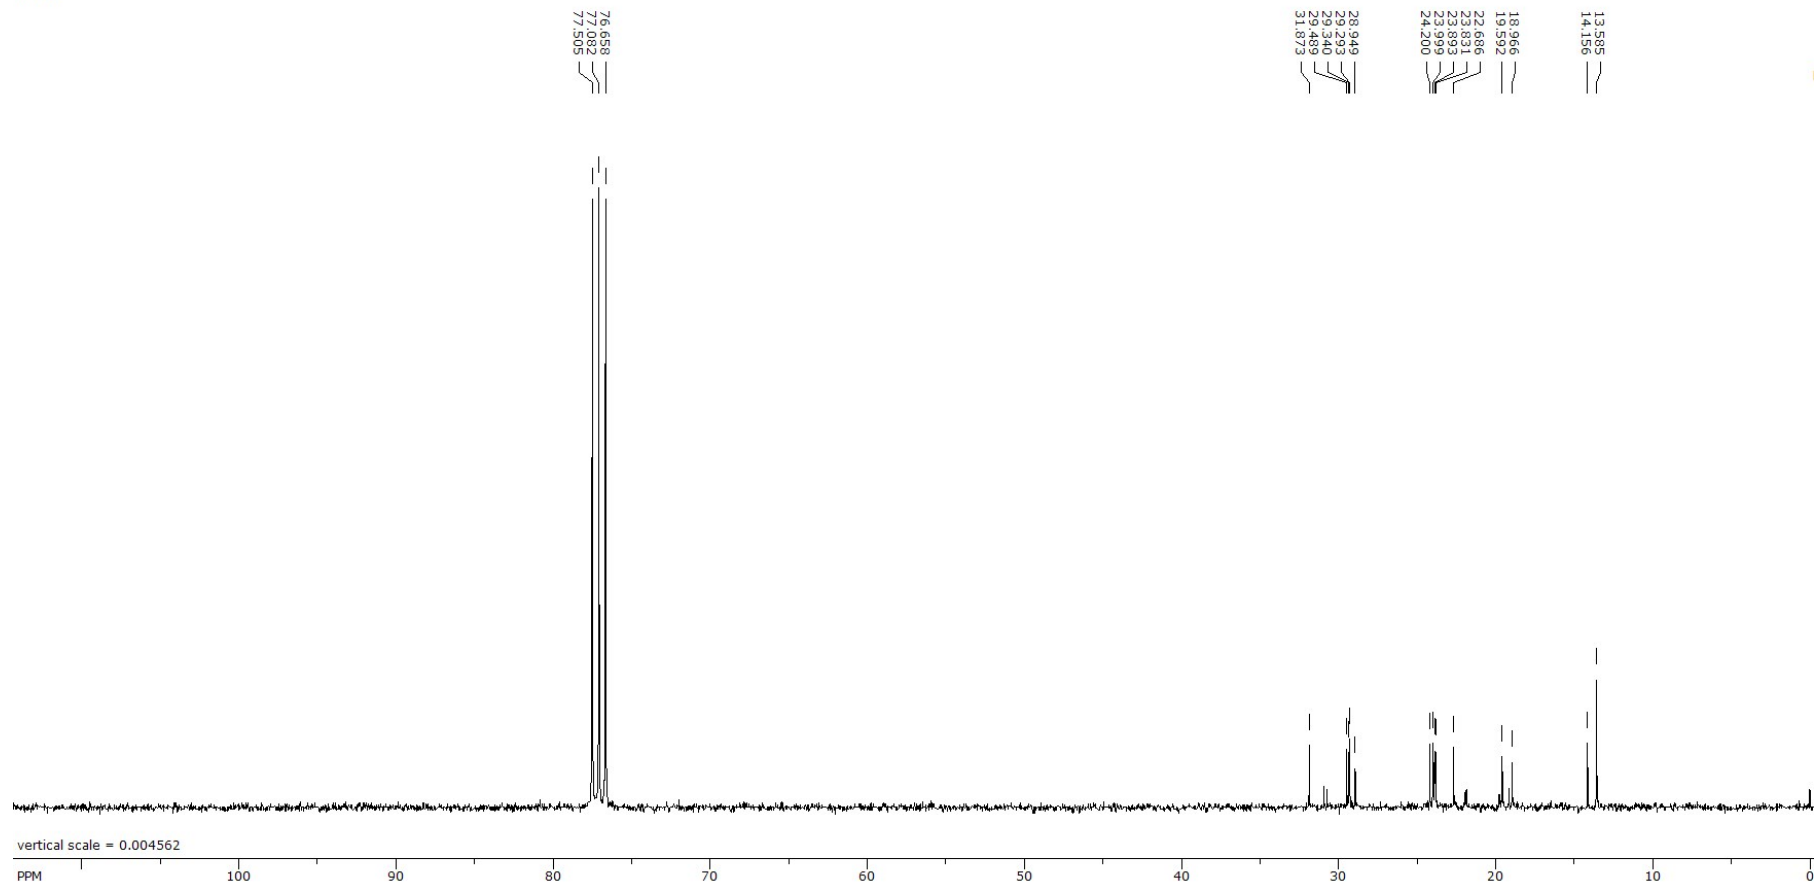

<sup>31</sup>P NMR

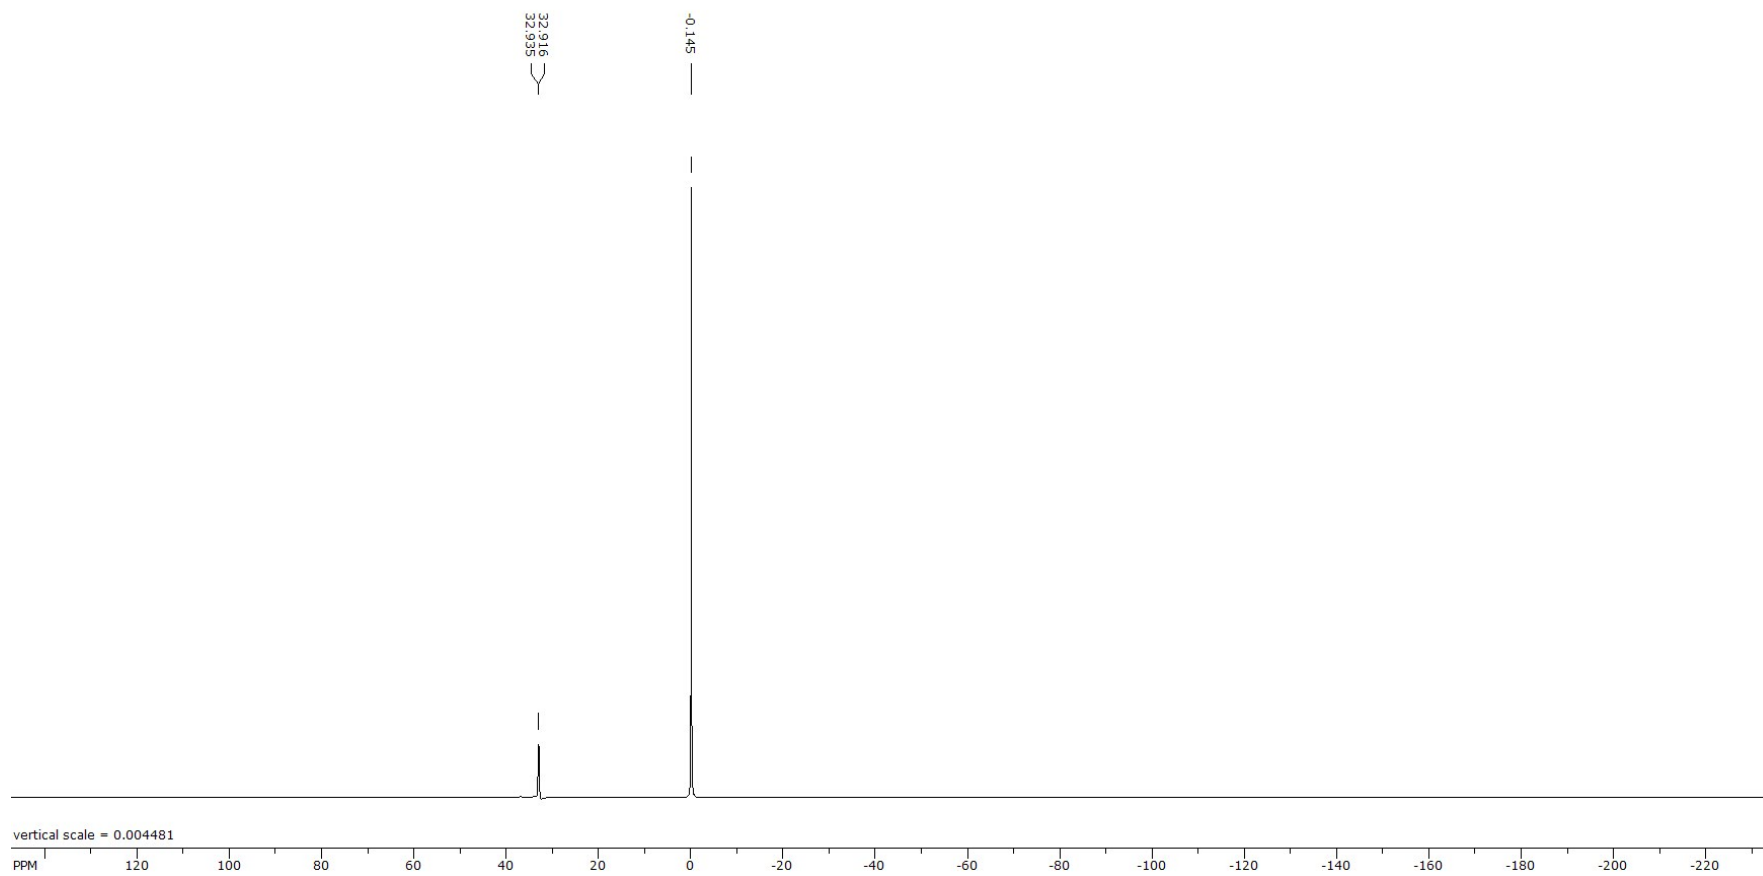

[P<sub>44410</sub>][BrI<sub>2</sub>]

<sup>1</sup>H NMR

no title

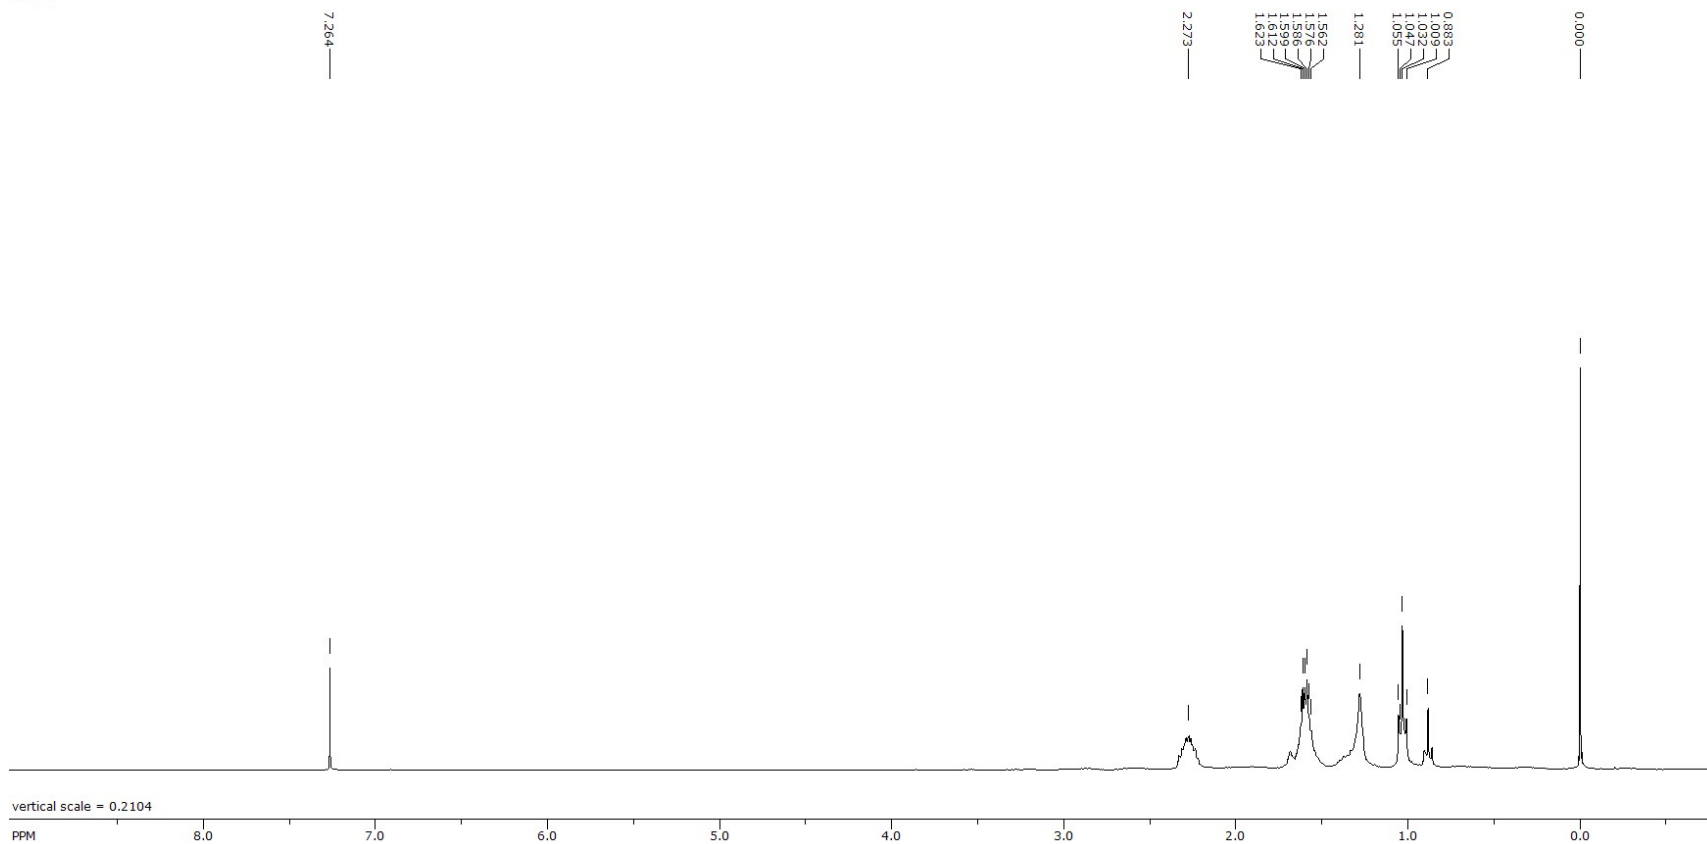

# <sup>13</sup>C NMR

no title

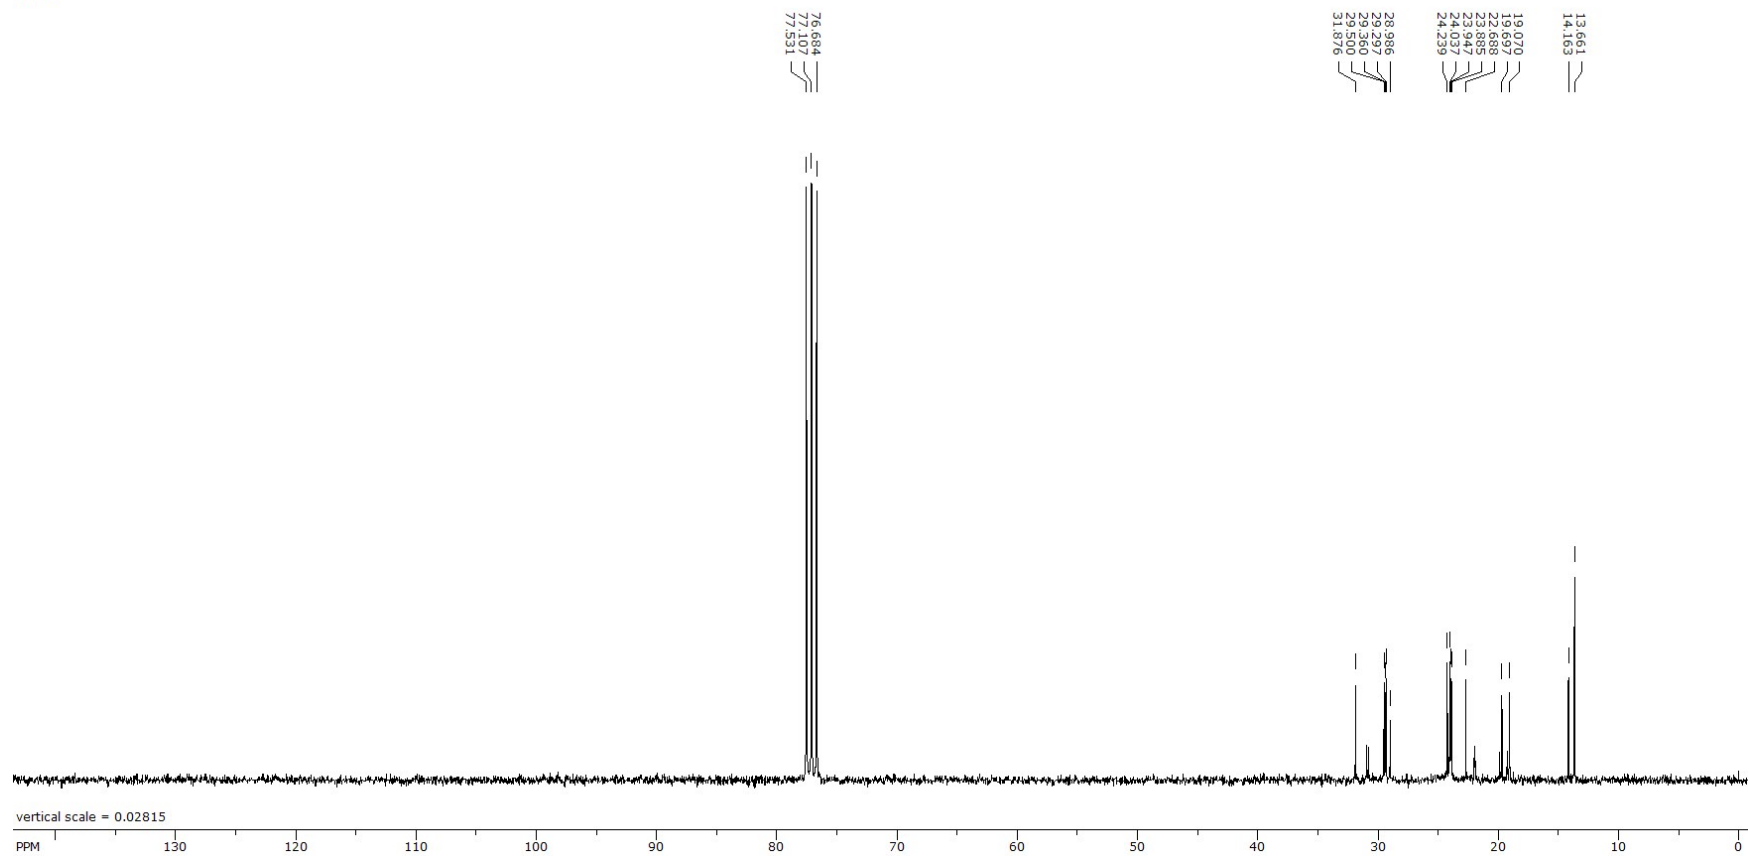

<sup>31</sup>P NMR

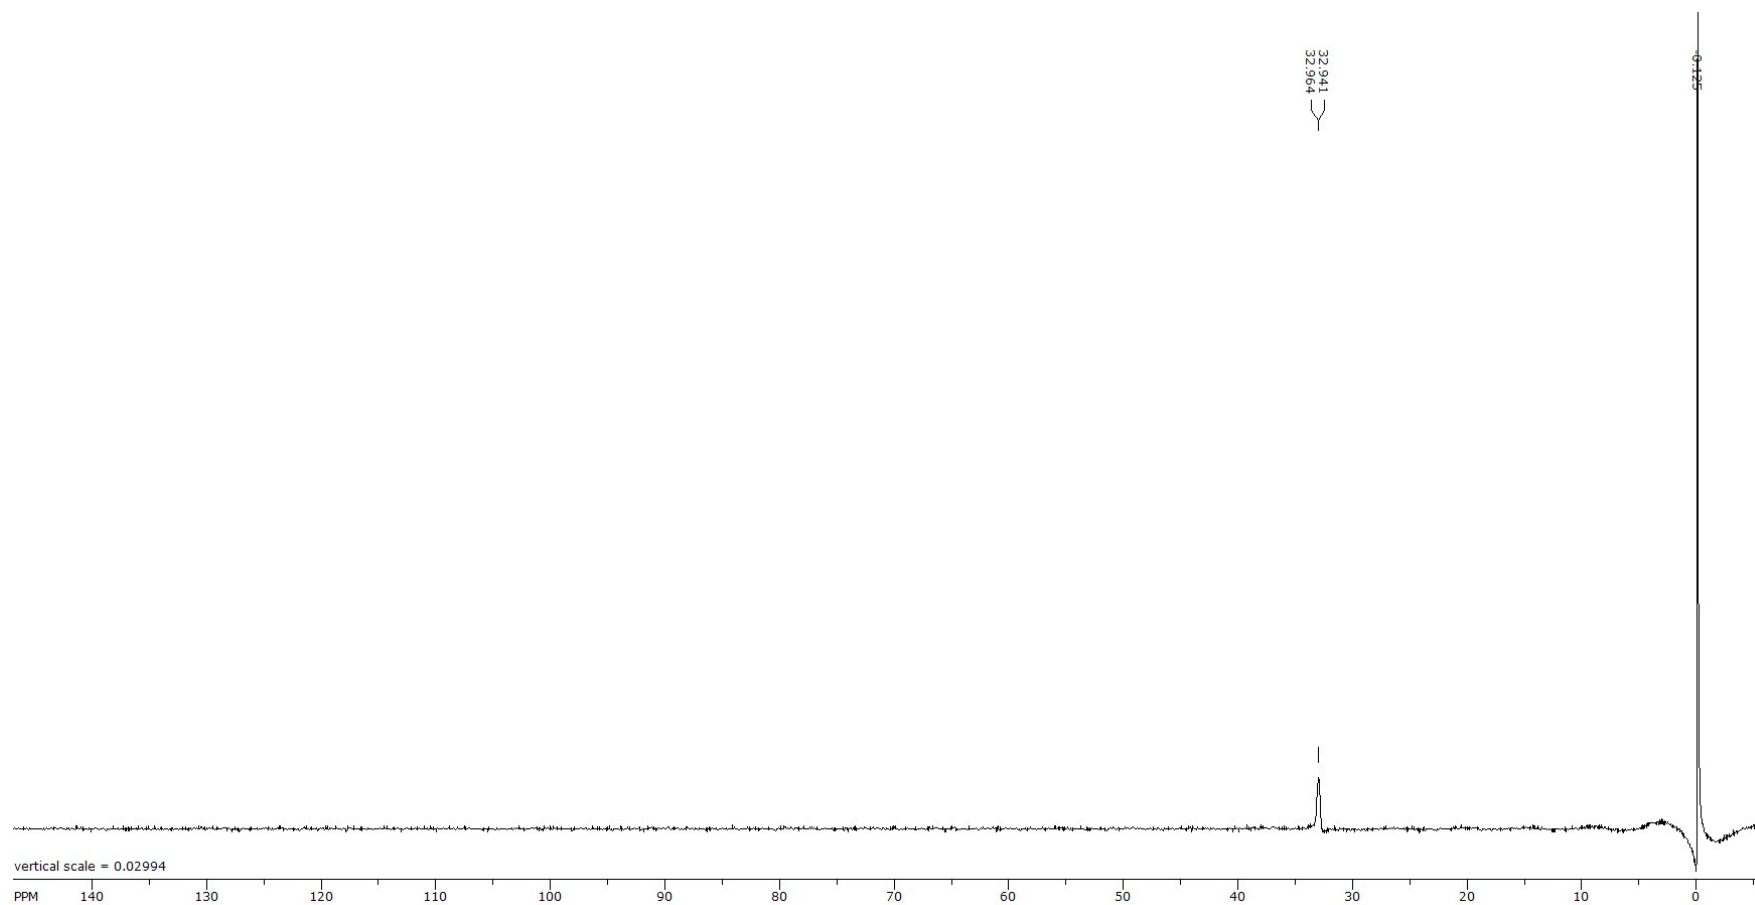

[P<sub>44410</sub>][I<sub>3</sub>]  
<sup>1</sup>H NMR

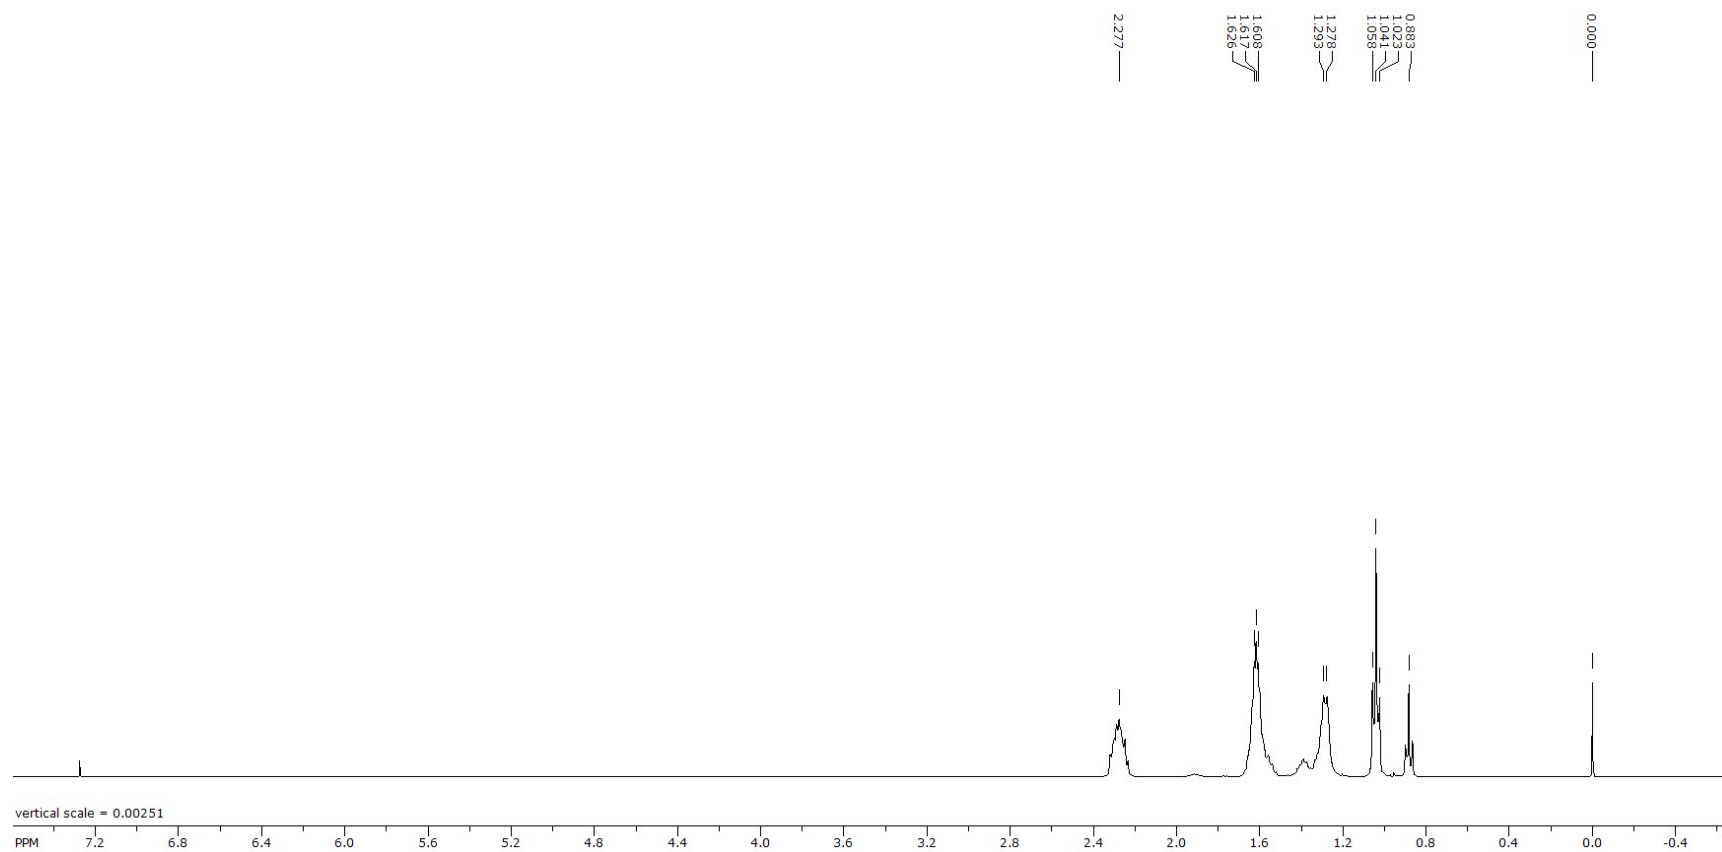

<sup>13</sup>C NMR

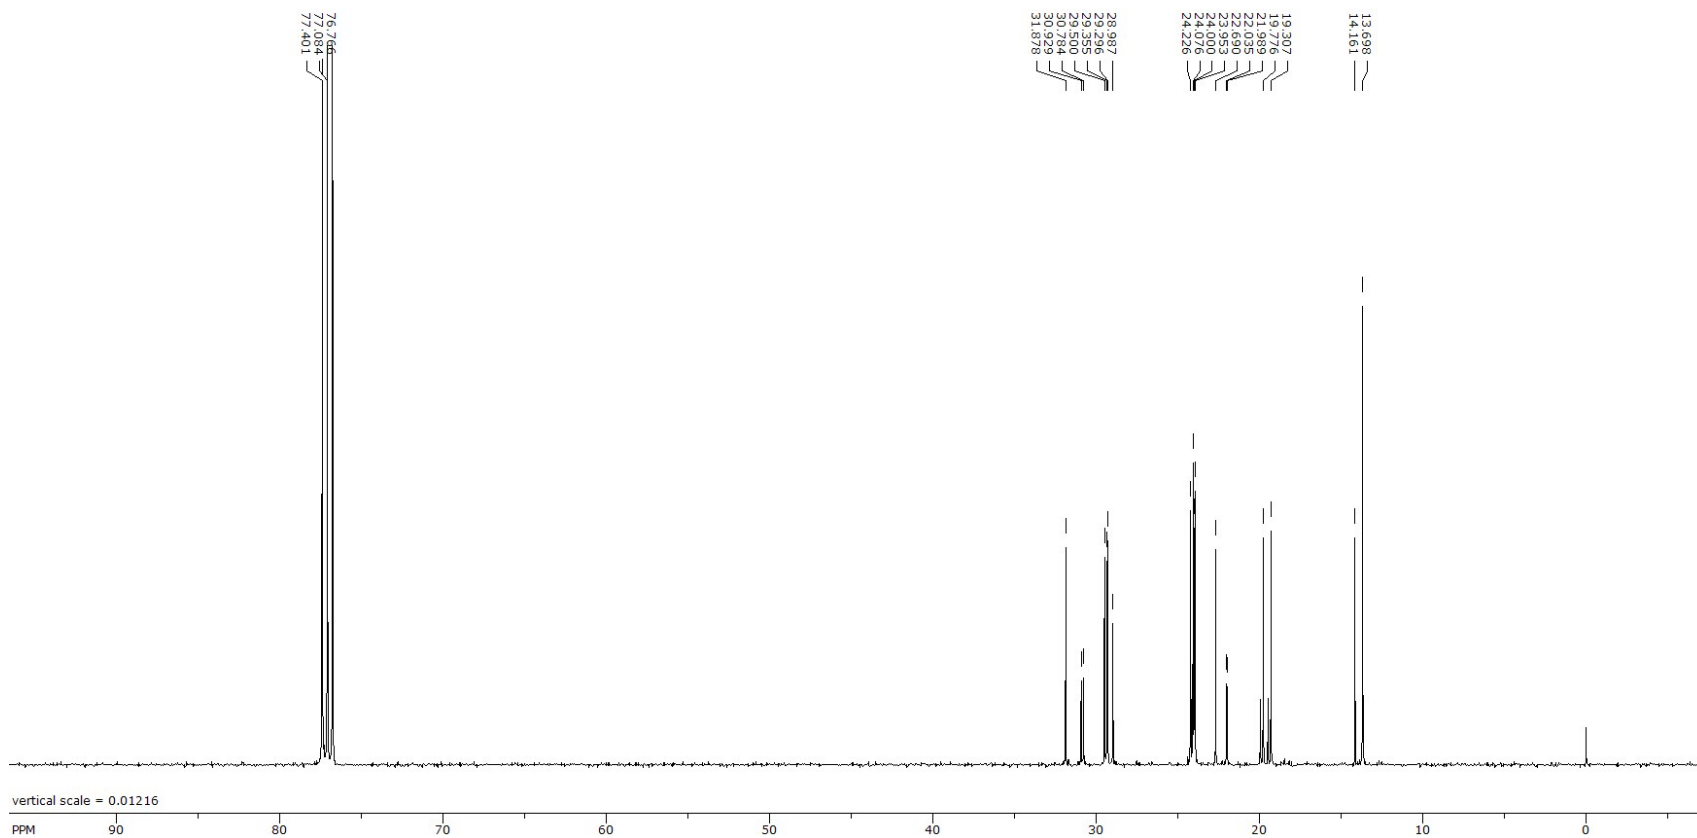

<sup>31</sup>P NMR

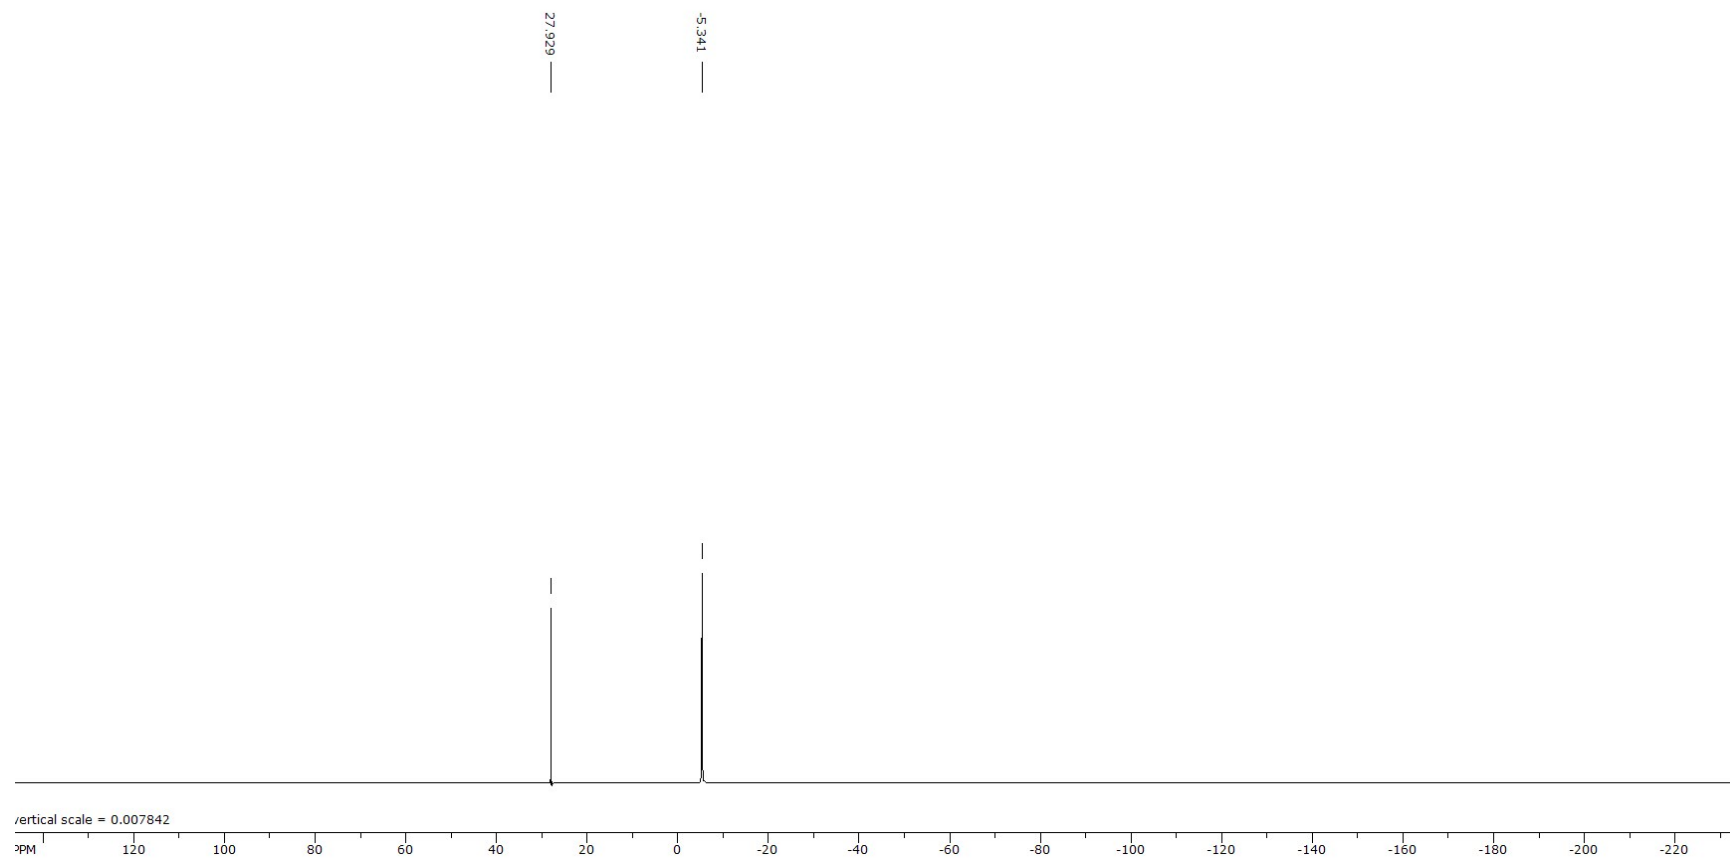



[P<sub>66614</sub>][Cl<sub>3</sub>]

<sup>1</sup>H NMR

no title

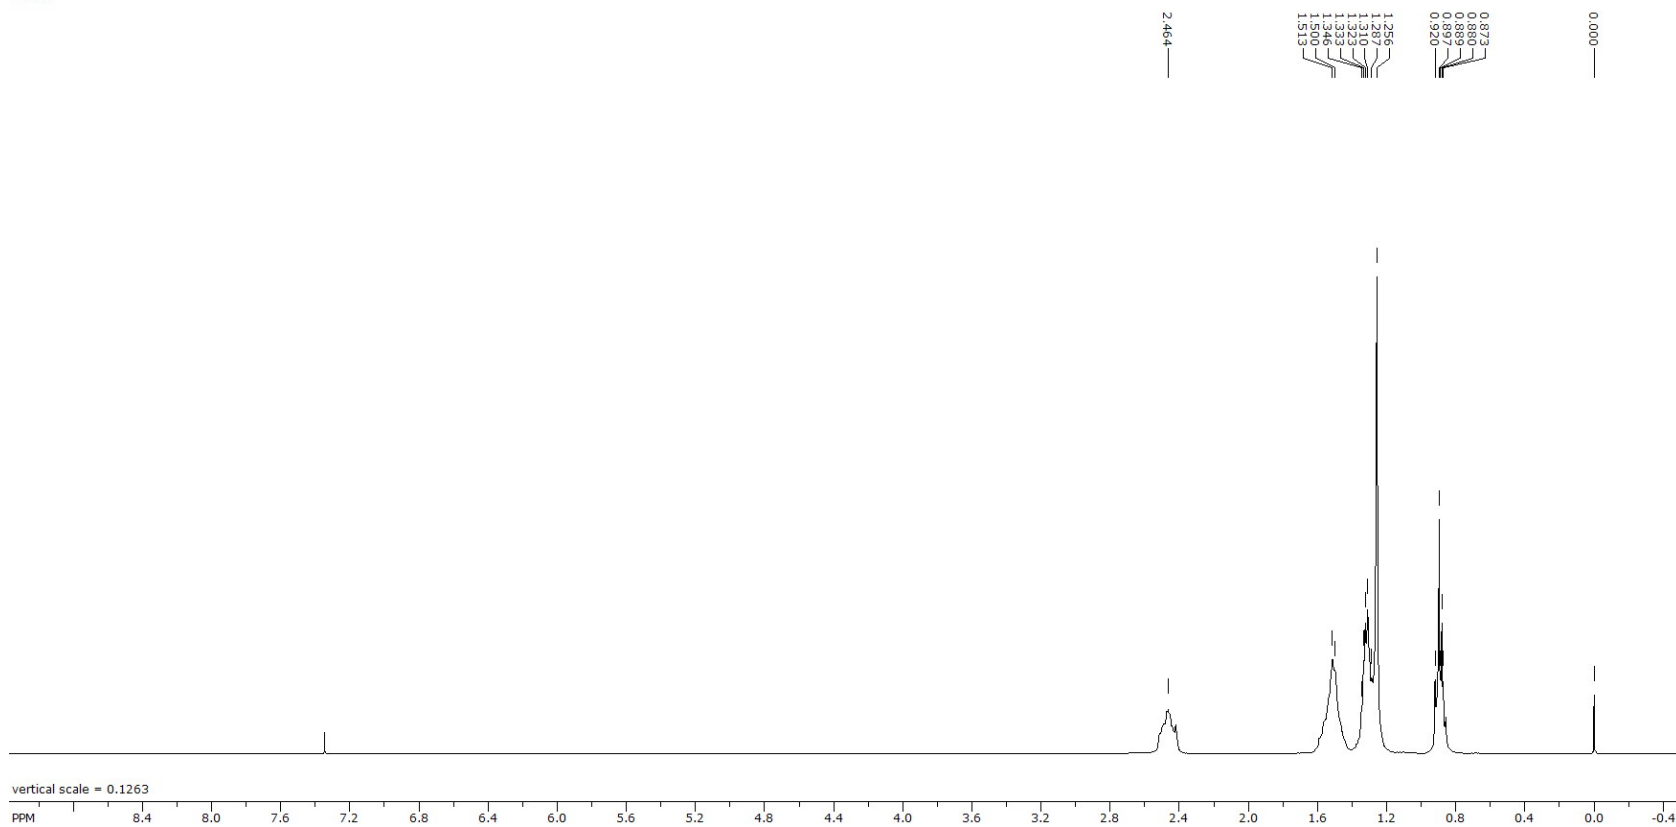

# <sup>13</sup>C NMR

no title

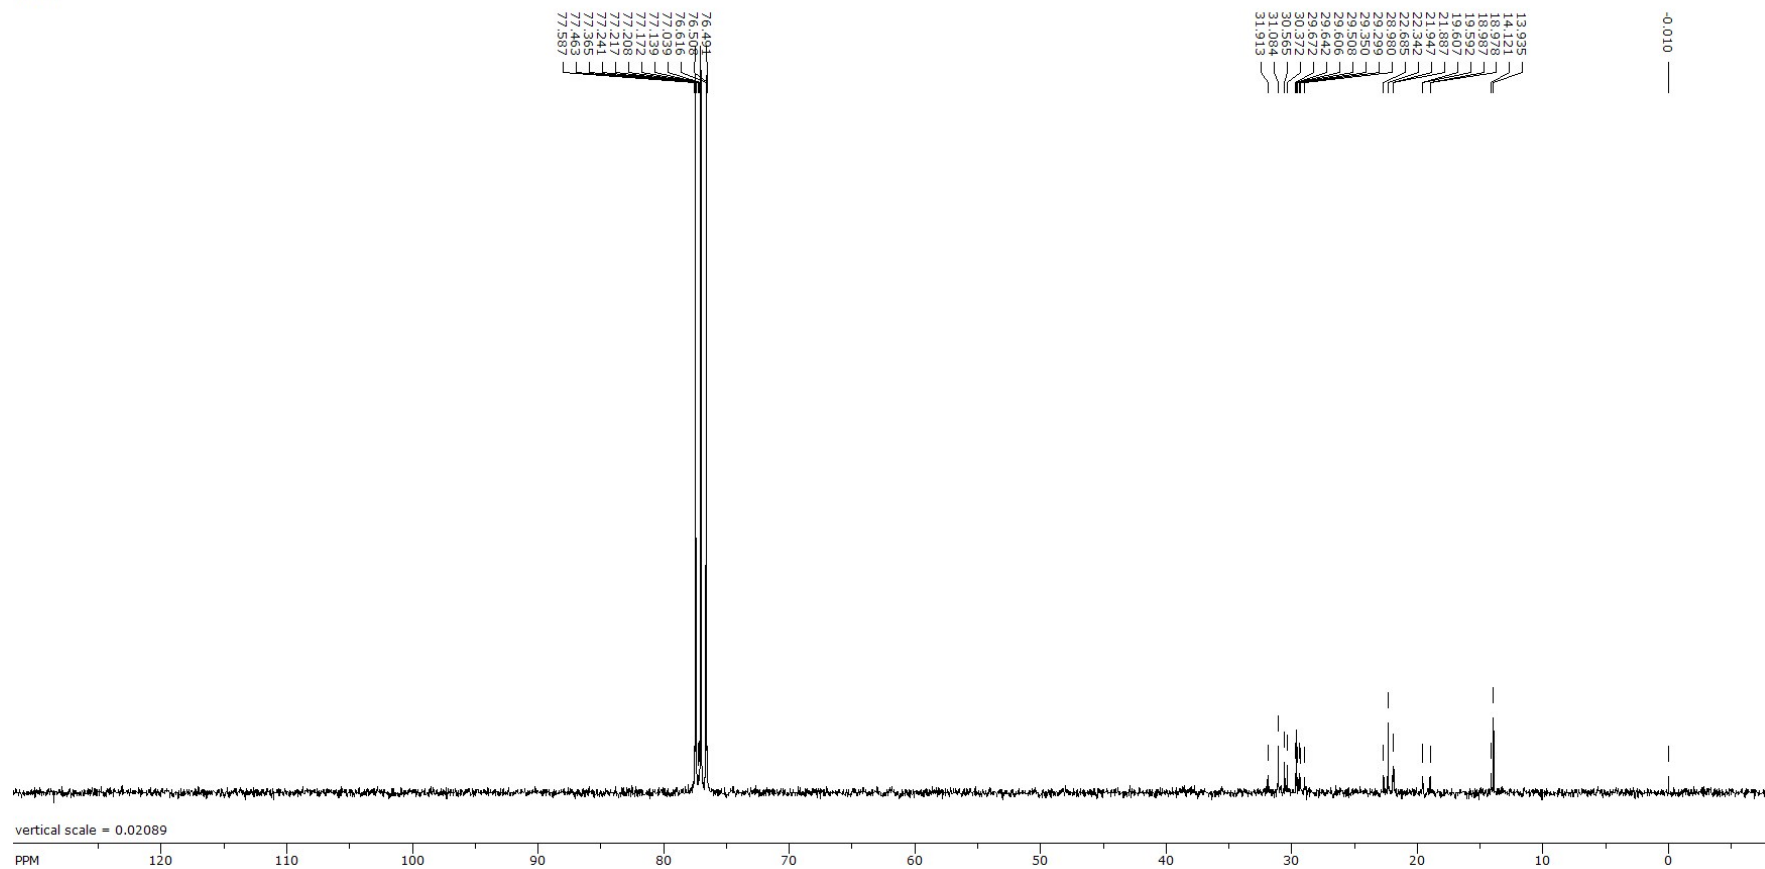

<sup>31</sup>P NMR

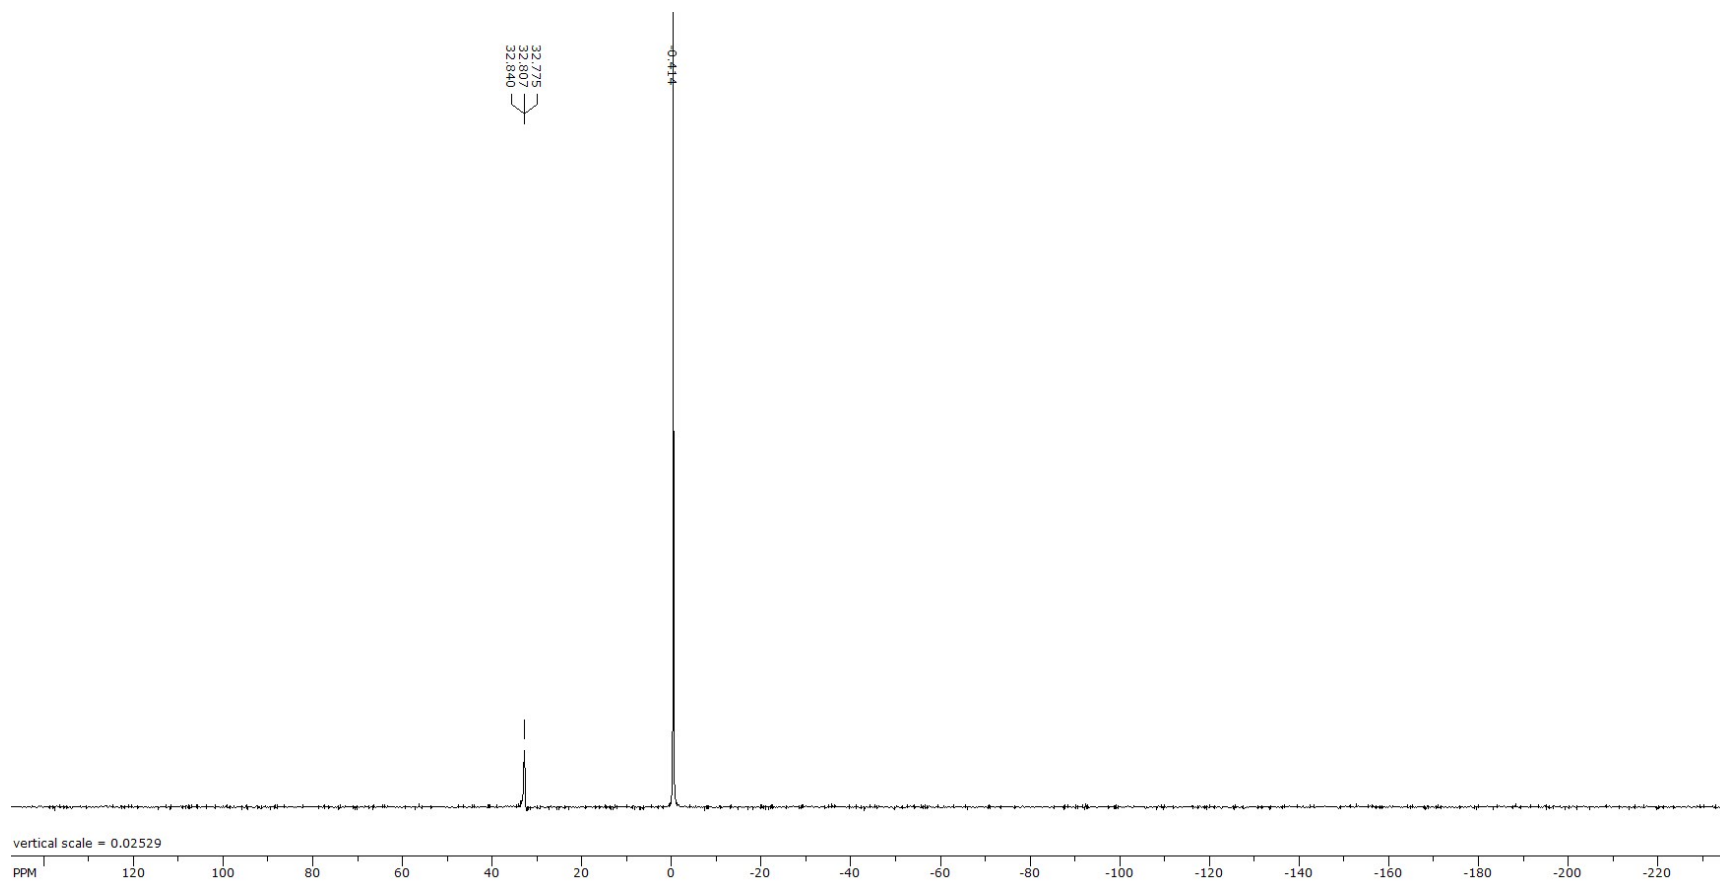

[P<sub>66614</sub>][ClBr<sub>2</sub>]

<sup>1</sup>H NMR

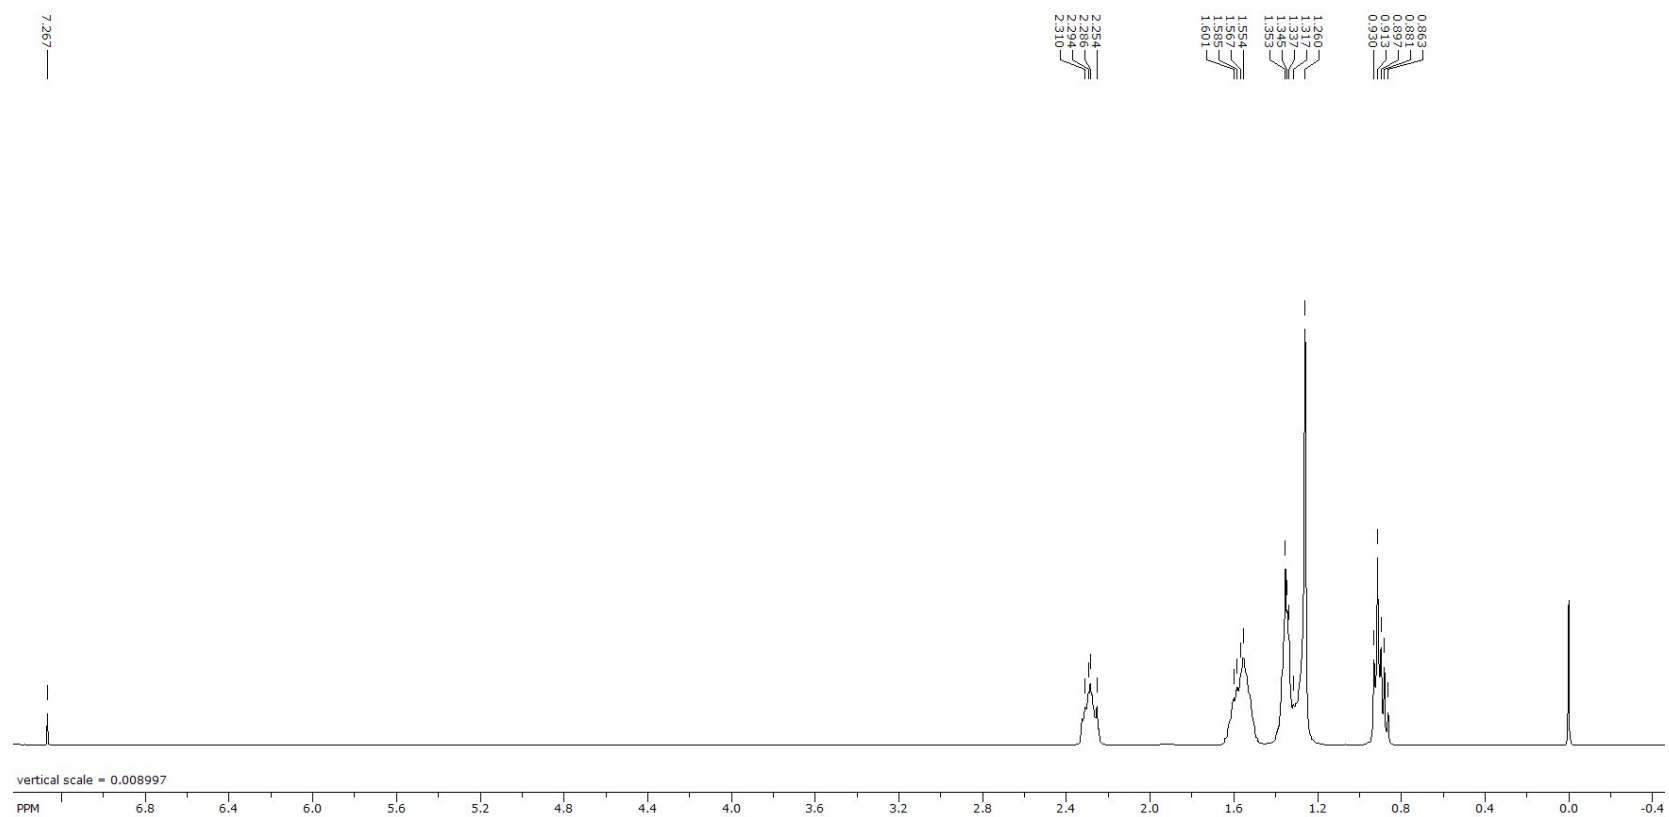

<sup>13</sup>C NMR

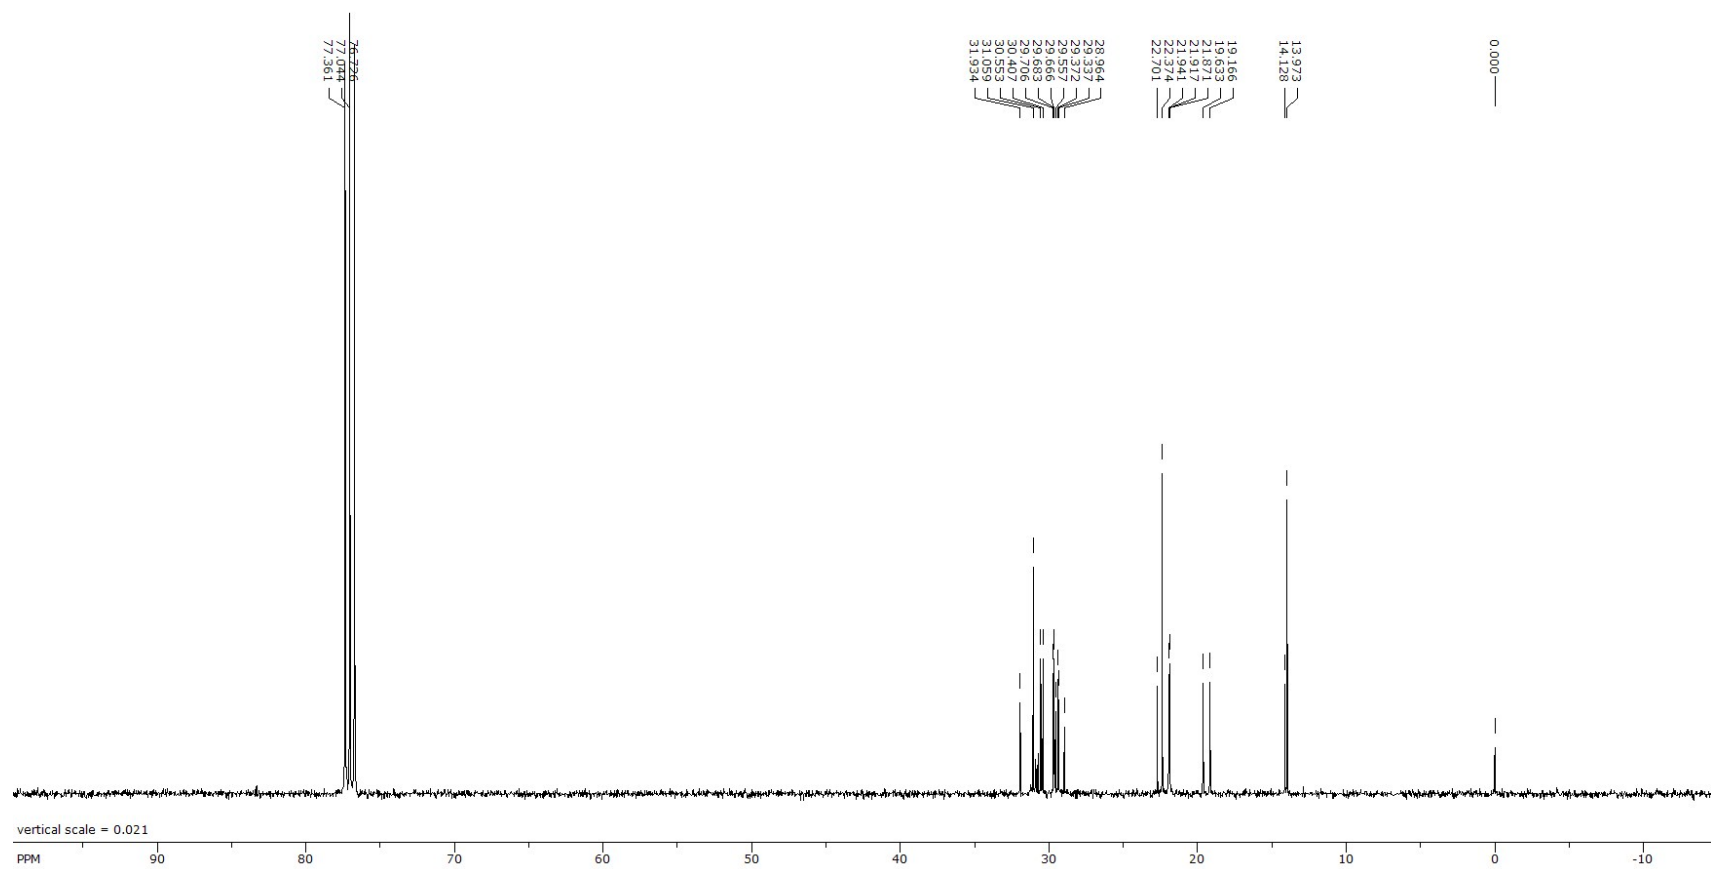

<sup>31</sup>P NMR

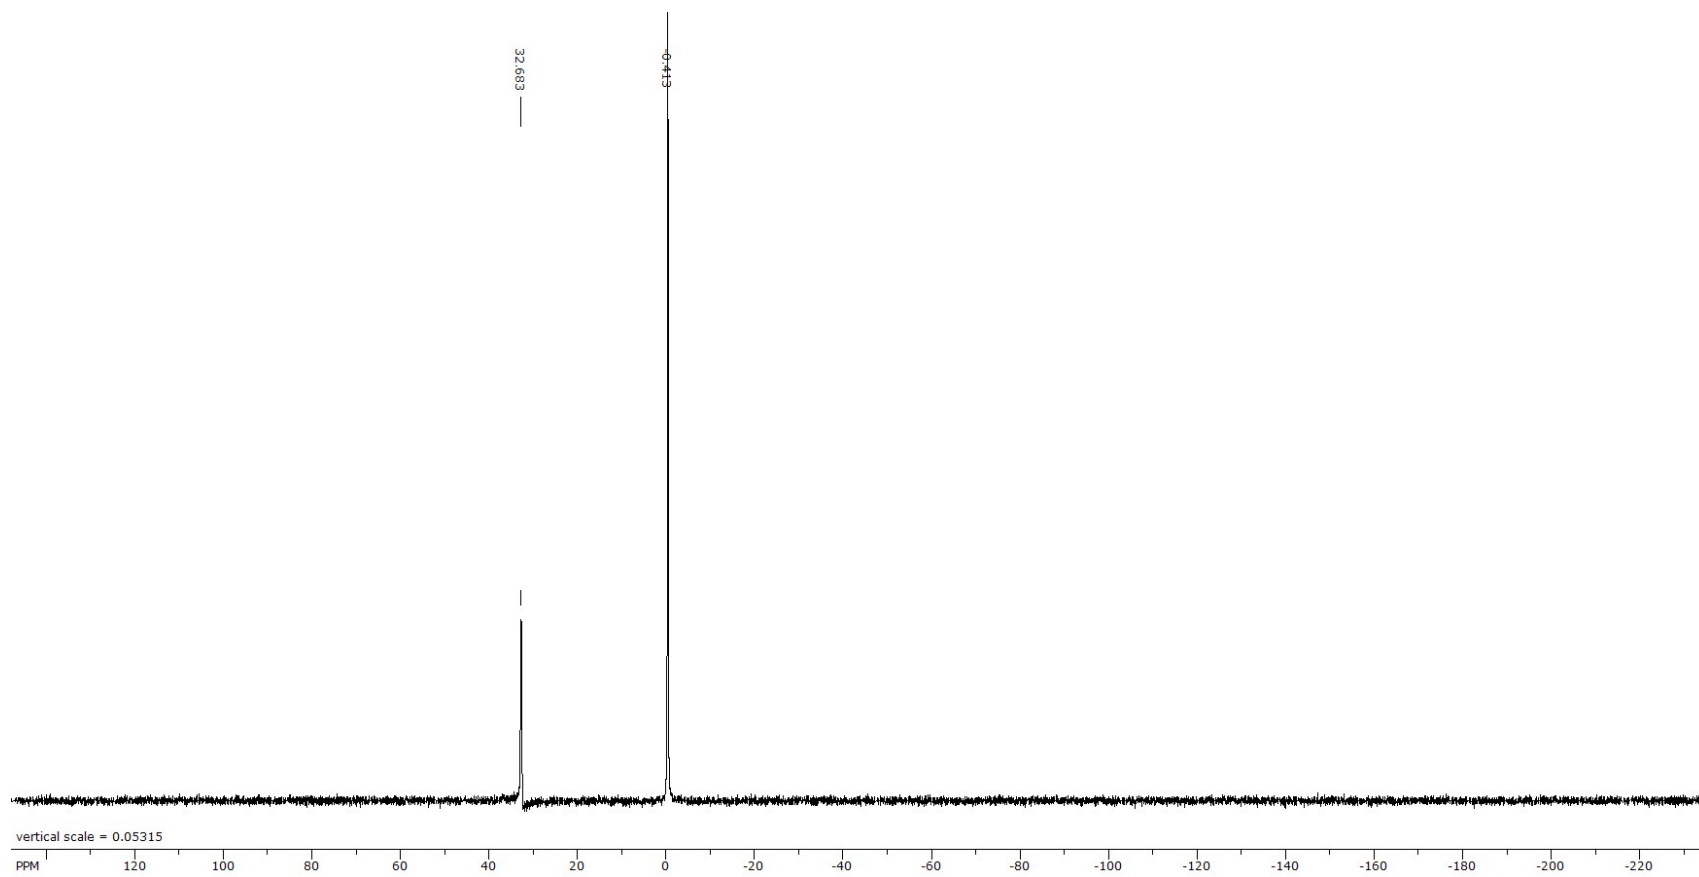

[N<sub>44410</sub>][Br<sub>3</sub>]

<sup>1</sup>H NMR

no title

shift = -0.3406 ppm    inten. = 0.0023    abs. = 82030  
frequency = 300.129900 MHz

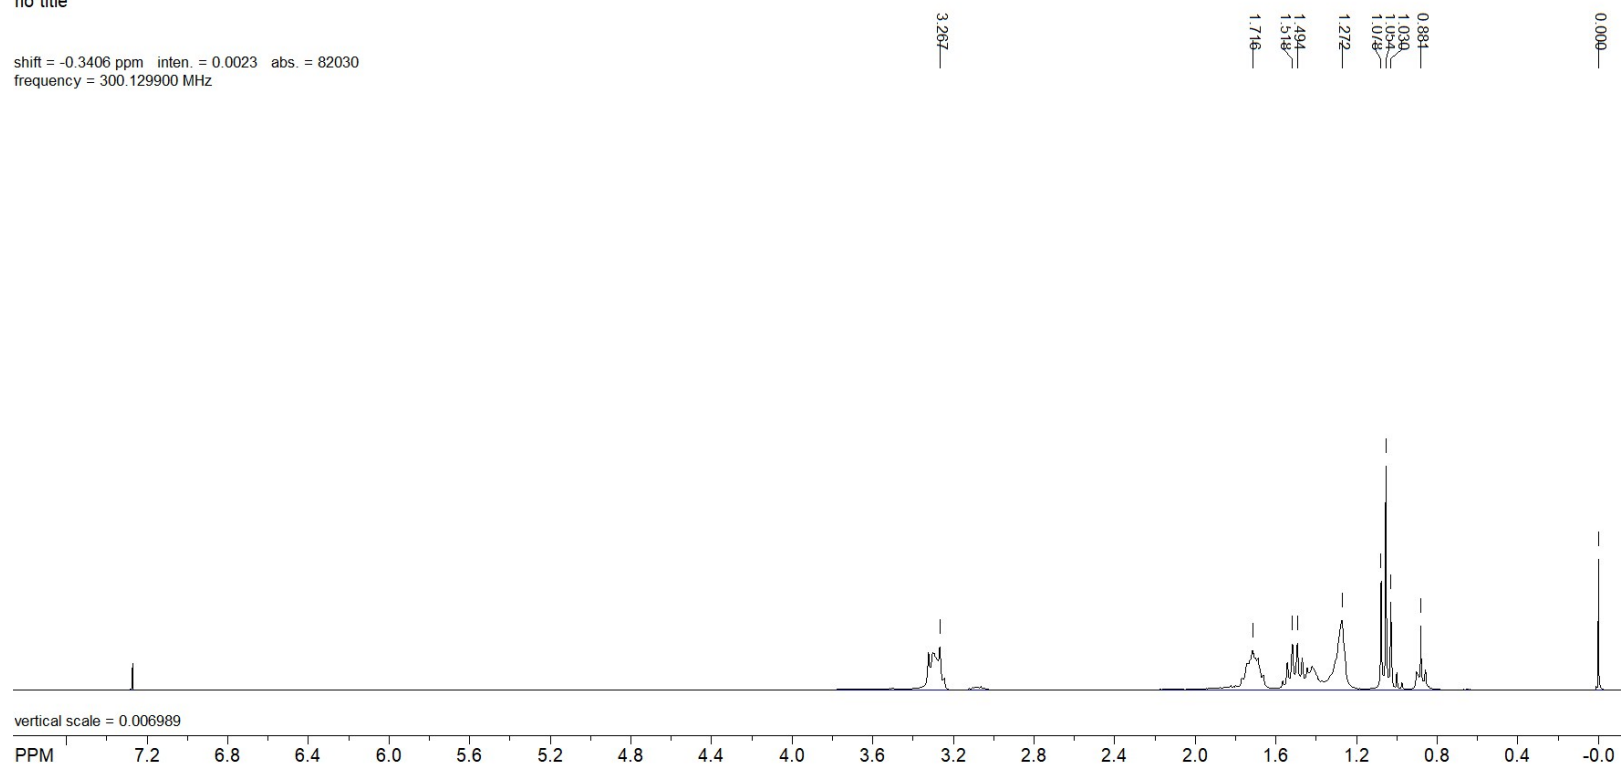

# <sup>13</sup>C NMR

no title

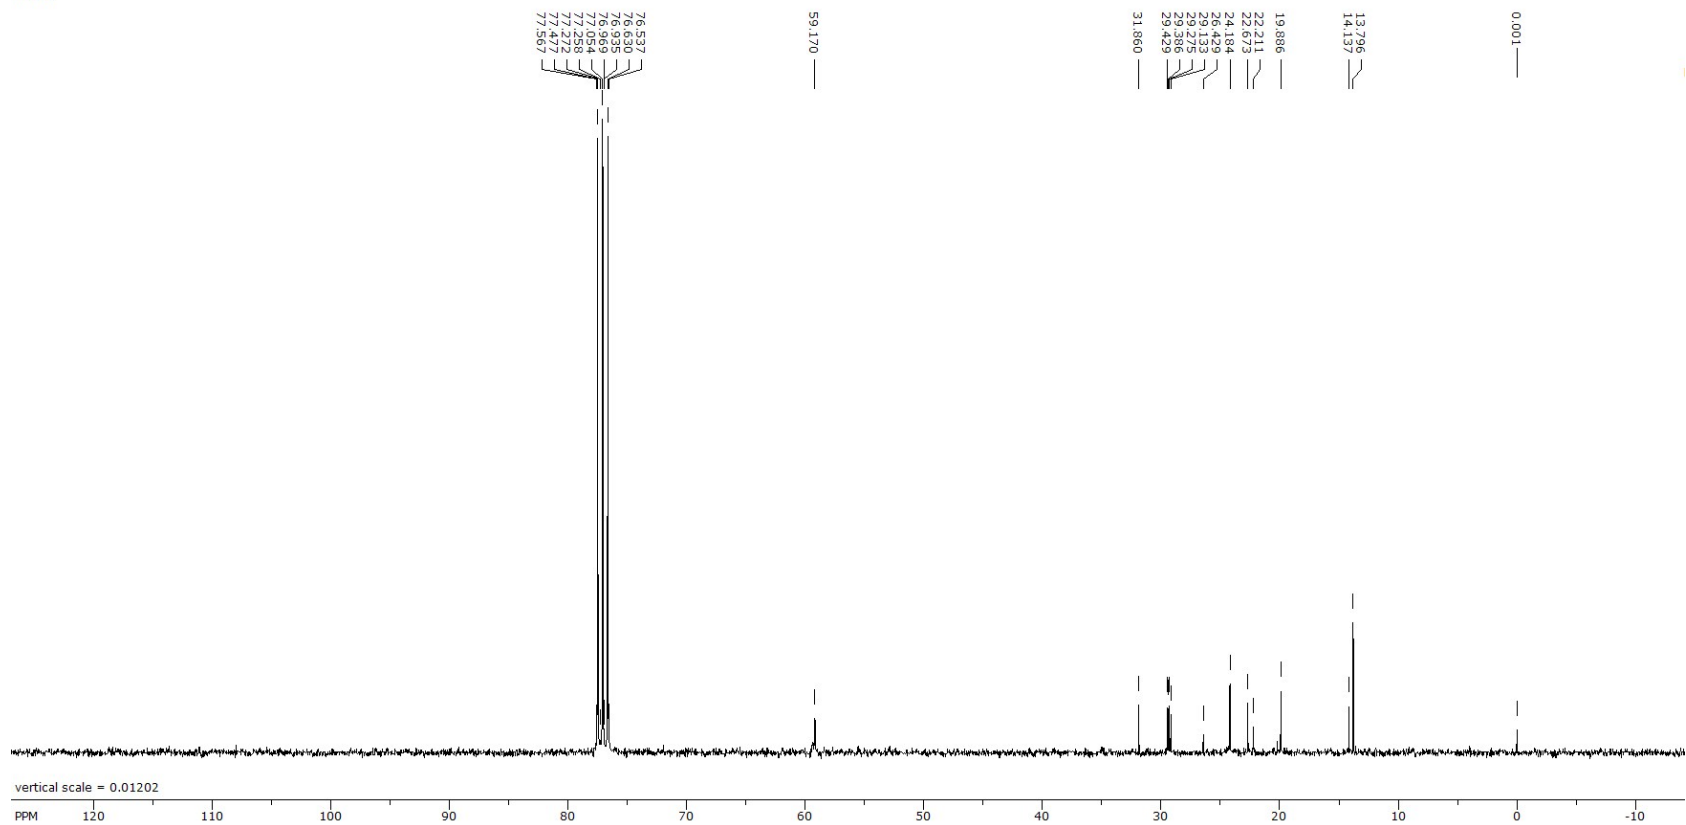



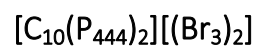

$^1H$  NMR

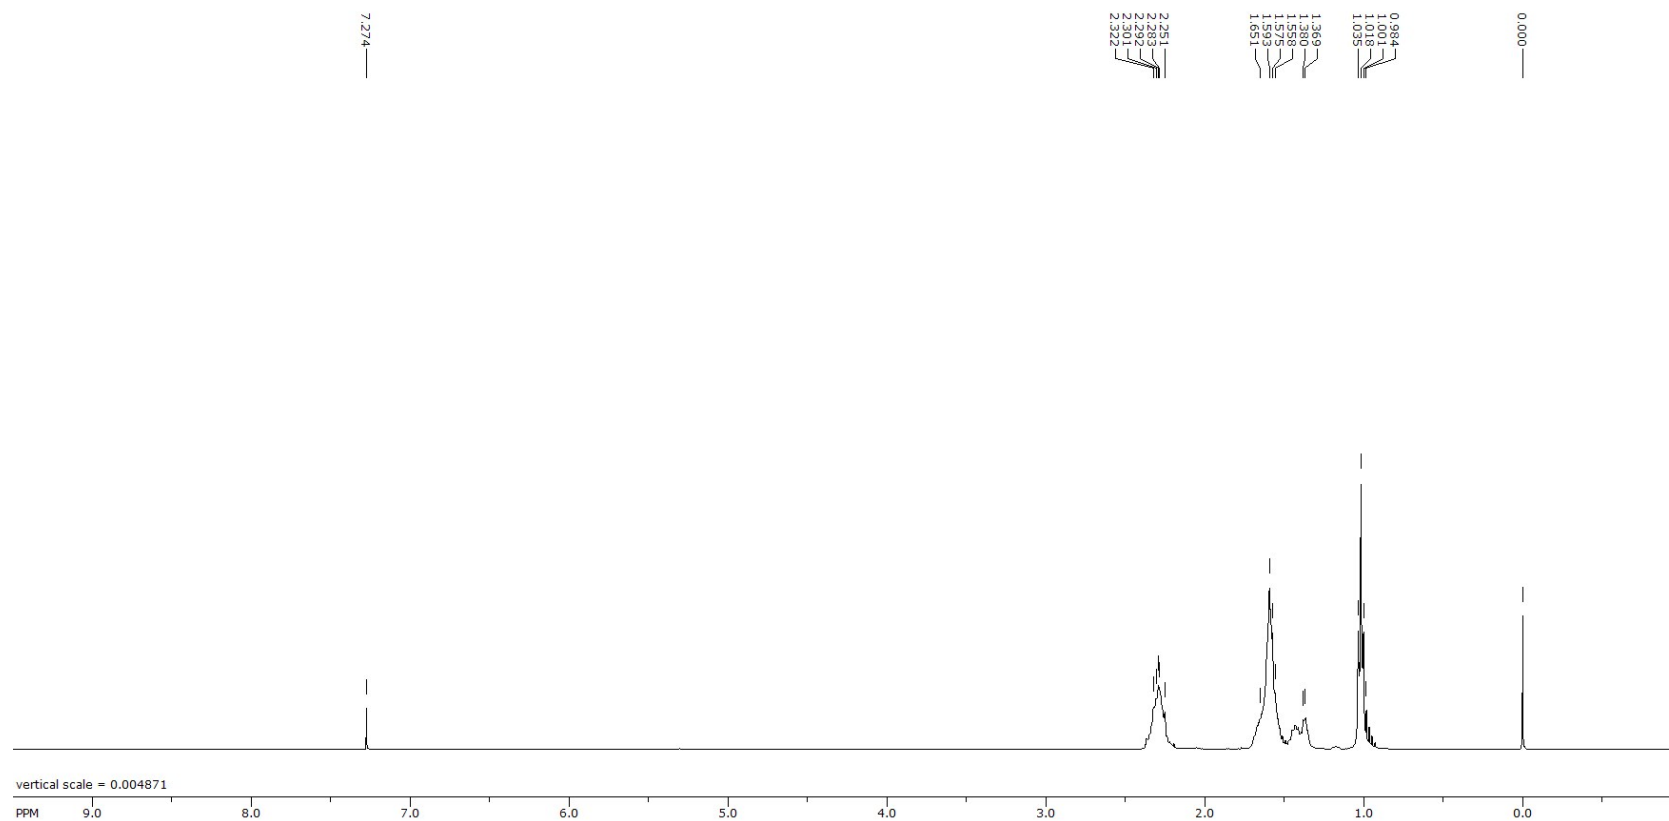

<sup>13</sup>C NMR

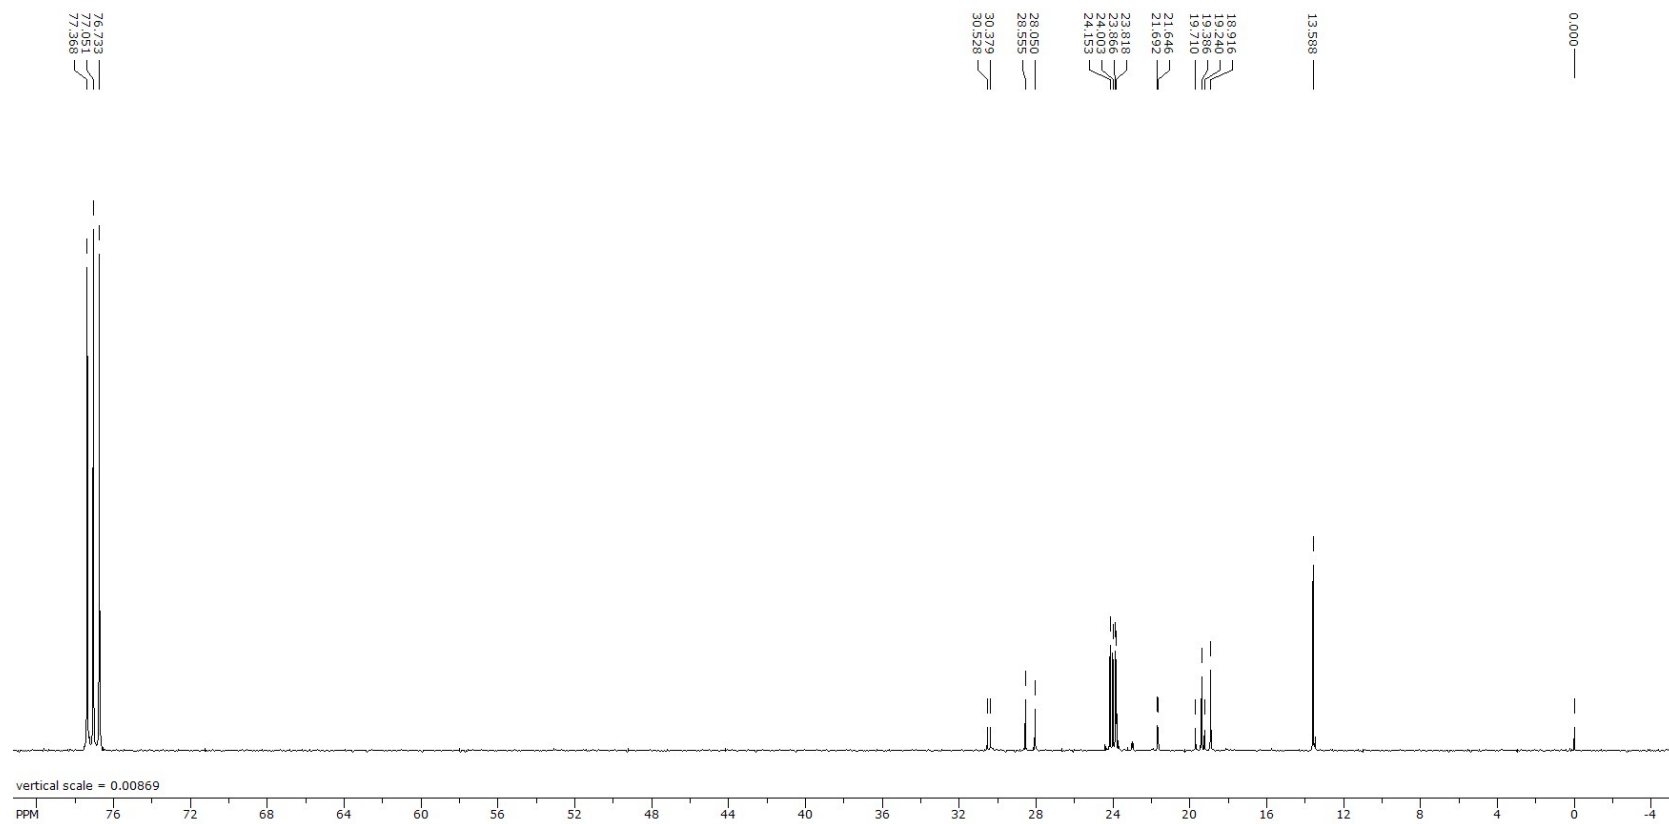

<sup>31</sup>P NMR

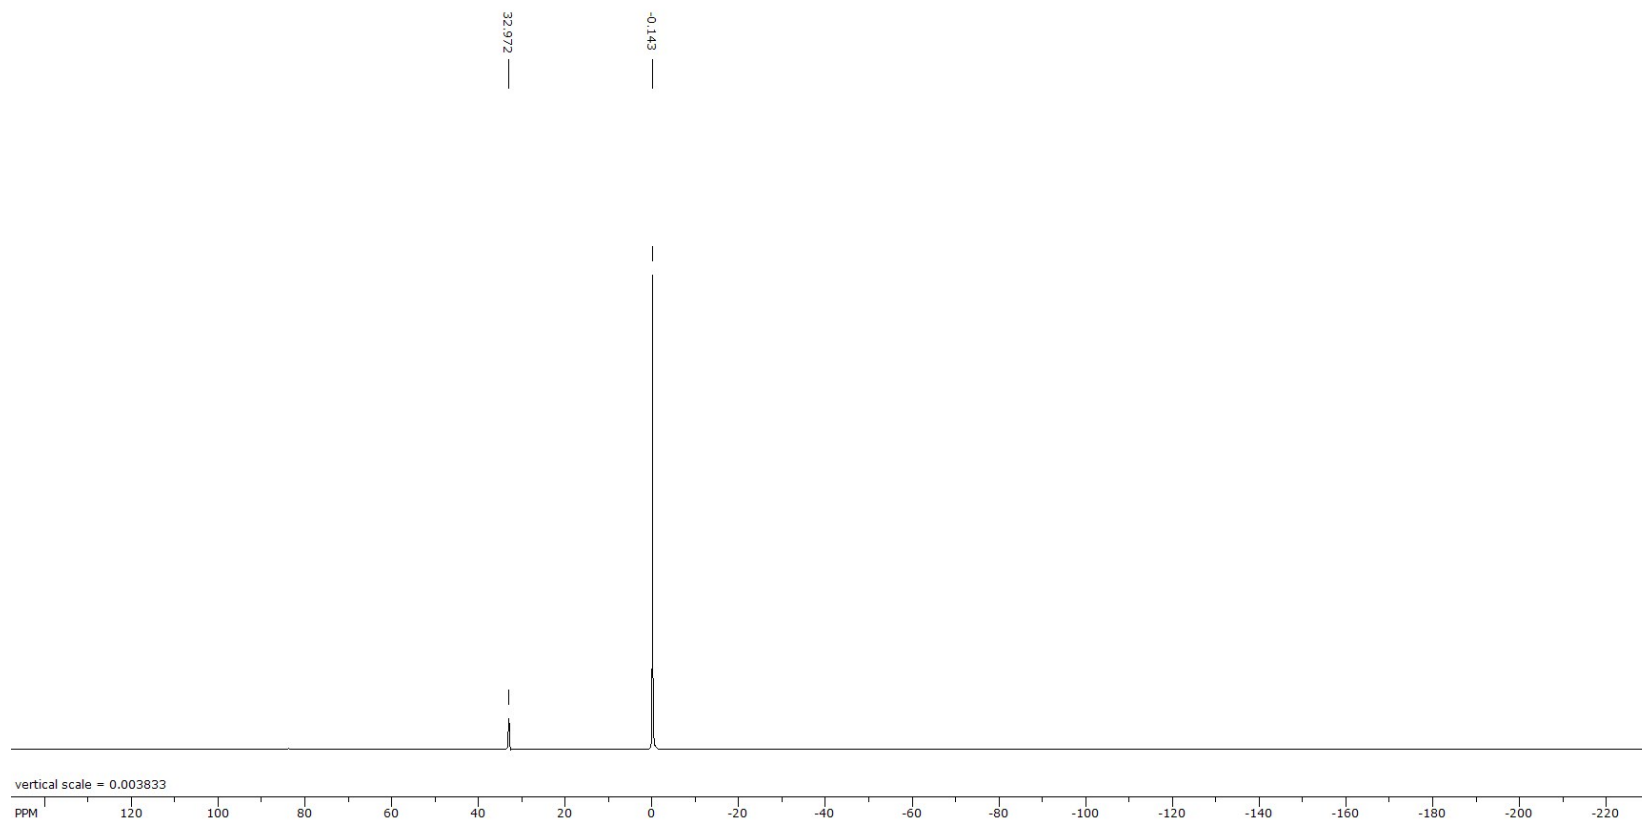

Supplement: c8gc01061g1.pdf [file c8gc01061g1.pdf]
